# Supplementary material for: The viral expression and immune status in human cancers and insights into novel biomarkers of immunotherapy
Source: BMC Cancer. 2021 Nov 5;21:1183. doi: 10.1186/s12885-021-08871-9 (PMC8571886; doi:10.1186/s12885-021-08871-9)
Supplement: Supplementary file 5 — Additional file 5: Supplementary Table 4. Gender, Race and Age analyses. [file 12885_2021_8871_MOESM5_ESM.xlsx]

## Sheet: Title Page
The viral expression and immune status in human cancers and insights into novel biomarkers of immunotherapy
Siyuan Chen1,3,4, Hongyan Lai2,3,4, Jingjing Zhao2, Bing Chen1,3, Yan Li2, Yuchen Li2, Qin Li2, Qiupeng Zheng2, Shenglin Huang2,3, *, Xiaodong Zhu1,3, *
1Department of Medical Oncology, Fudan University Shanghai Cancer Center, Fudan University, Shanghai, 200032, China
2Fudan University Shanghai Cancer Center, Key Laboratory of Medical Epigenetics and Metabolism, Institutes of Biomedical Sciences, Fudan University, Shanghai 200032, China
3Department of Oncology, Shanghai Medical College, Fudan University, Shanghai, China
4These authors contributed equally to this work
Corresponding authors: Xiaodong Zhu, Ph.D., xddr001@163.com; Department of Medical Oncology, Fudan University Shanghai Cancer Center, Fudan University, Shanghai, 200032, China. Tel.: 86-21-64175590*88907; Fax: 86-21-64430366. Or Shenglin Huang, Ph.D., slhuang@fudan.edu.cn; Fudan University Shanghai Cancer Center and Institutes of Biomedical Sciences, Fudan University, 270 Dong An Rd., Shanghai 20…

## Sheet: Supplementary Table 4
Supplementary Table 4: Gender, Race and Age analyses
Gender
STAD	EBV+	EBV-		Percentage of row total	EBV+	EBV-		Chi-square, df	6.403, 1
male	35	208		male	14.40%	85.60%		z	2.53
female	8	129		female	5.84%	94.16%		P value	0.0114
								P value summary	*
LIHC	HBV+	HBV-		Percentage of row total	HBV+	HBV-		Chi-square, df	13.05, 1
male	94	156		male	37.60%	62.40%		z	3.613
female	23	98		female	19.01%	80.99%		P value	0.0003
								P value summary	***
HNSC	HPV+	HPV-		Percentage of row total	HPV+	HPV-		Chi-square, df	11.04, 1
male	62	306		male	16.85%	83.15%		z	3.323
female	7	126		female	5.26%	94.74%		P value	0.0009
								P value summary	***
LAML	CMV+	CMV-		Percentage of row total	CMV+	CMV-		Chi-square, df	1.207, 1
male	27	56		male	32.53%	67.47%		z	1.098
female	28	40		female	41.18%	58.82%		P value	0.272
								P value summary	ns
STAD	CMV+	CMV-		Percentage of row total	CMV+	CMV-		Chi-square, df	0.2447, 1
male	27	216		male	11.11%	88.89%		z	0.4947
female	13	124		female	9.49%	90.51%		P value	0.6208
								P value summary	ns
Race
STAD	EBV+	EBV-		Chi-square, df	0.2399, 2
asian	10	65		P value	0.887
black or african american	1	10		P value summary	ns
white	28	212
* white including native hawaiian or other pacific islander
LIHC	HBV+	HBV-		Chi-square, df	162.9, 2
asian	107	51		P value	<0.0001
black or african american	4	13		P value summary	****
white	6	180
* white including american indian or alaska native
CESC	HPV+	HPV-		Chi-square, df	0.1686, 2
asian	19	1		P value	0.9192
black or african american	29	1		P value summary	ns
white	207	11
* white including american indian or alaska native, and native hawaiian or other pacific islander
HNSC	HPV+	HPV-		Chi-square, df	2.821, 2
asian	1	9		P value	0.244
black or african american	3	44		P value summary	ns
white	65	364
* white including american indian or alaska native
STAD	CMV+	CMV-		Chi-square, df	1.104, 2
asian	10	65		P value	0.5759
black or african american	1	10		P value summary	ns
white	22	218
* white including native hawaiian or other pacific islander
LAML	CMV+	CMV-		Chi-square, df	1.745, 2
asian	1	0		P value	0.418
black or african american	5	8		P value summary	ns
white	49	86
Age
STAD	EBV+	EBV-	p-value ( Welch Two Sample t-test)
mean	67.59	68.07	0.9454
LIHC	HBV+	HBV-	p-value(Mann-Whitney U test)
median	54.74	64.8	1.21e-10
CESC	HPV+	HPV-	p-value(Mann-Whitney U test)
median	46.17	55.52	0.01344
HNSC	HPV+	HPV-	p-value(Mann-Whitney U test)
median	58.4	62.01	0.003412
LAML	CMV+	CMV-	p-value(Mann-Whitney U test)
median	52.2	58.54	0.575
STAD	CMV+	CMV-	p-value(Mann-Whitney U test)
median	69.1	67.87	0.6206
