# Supplementary material for: The viral expression and immune status in human cancers and insights into novel biomarkers of immunotherapy
Source: BMC Cancer. 2021 Nov 5;21:1183. doi: 10.1186/s12885-021-08871-9 (PMC8571886; doi:10.1186/s12885-021-08871-9)
Supplement: Supplementary file 6 — Additional file 6: Supplementary Table 5. TIDE and TIME information for TCGA SKCM dataset. [file 12885_2021_8871_MOESM6_ESM.xlsx]

## Sheet: Title Page
The viral expression and immune status in human cancers and insights into novel biomarkers of immunotherapy
Siyuan Chen1,3,4, Hongyan Lai2,3,4, Jingjing Zhao2, Bing Chen1,3, Yan Li2, Yuchen Li2, Qin Li2, Qiupeng Zheng2, Shenglin Huang2,3, *, Xiaodong Zhu1,3, *
1Department of Medical Oncology, Fudan University Shanghai Cancer Center, Fudan University, Shanghai, 200032, China
2Fudan University Shanghai Cancer Center, Key Laboratory of Medical Epigenetics and Metabolism, Institutes of Biomedical Sciences, Fudan University, Shanghai 200032, China
3Department of Oncology, Shanghai Medical College, Fudan University, Shanghai, China
4These authors contributed equally to this work
Corresponding authors: Xiaodong Zhu, Ph.D., xddr001@163.com; Department of Medical Oncology, Fudan University Shanghai Cancer Center, Fudan University, Shanghai, 200032, China. Tel.: 86-21-64175590*88907; Fax: 86-21-64430366. Or Shenglin Huang, Ph.D., slhuang@fudan.edu.cn; Fudan University Shanghai Cancer Center and Institutes of Biomedical Sciences, Fudan University, 270 Dong An Rd., Shanghai 20…

## Sheet: Supplementary Table 5
Supplementary Table 5: TIDE and TIME information for TCGA SKCM dataset
Patients	Cancer.type	No.benefits	Responder	TIDE	IFNG	MSI.Expr.Sig	Merck18	CD274	CD8	CTL.flag	Dysfunction	Exclusion	MDSC	CAF	TAM.M2	sampleID	TIME	LF
TCGA-3N-A9WB	SKCM	TRUE	FALSE	1.47	-2.34	0.81	-1.8	-0.62	-1.84	FALSE	-1.56	1.47	0.17	-0.03	0.08	TCGA-3N-A9WB	Immune exclusion	0.0547145
TCGA-3N-A9WC	SKCM	FALSE	FALSE	0.04	2.85	0.7	2.13	2.23	2.45	TRUE	0.04	-1.82	-0.1	-0.06	-0.12	TCGA-3N-A9WC	Immune stimulation	0.395689
TCGA-3N-A9WD	SKCM	FALSE	FALSE	0.43	0.73	0.79	0.24	0.22	0.62	TRUE	0.43	-0.6	-0.05	-0.05	0.01	TCGA-3N-A9WD	Immune anergy	0.354293
TCGA-BF-A1PU	SKCM	TRUE	FALSE	1.71	-2.55	0.25	-1.76	-1	-1.86	FALSE	-0.19	1.71	0.11	0.1	0.07	TCGA-BF-A1PU	Immune exclusion	0.0729015
TCGA-BF-A1PV	SKCM	TRUE	FALSE	2.05	-1.98	0.78	-1.58	-0.77	-1.77	FALSE	-1.8	2.05	0.15	0.08	0.08	TCGA-BF-A1PV	Immune exclusion	0.072309
TCGA-BF-A1PX	SKCM	FALSE	FALSE	1.83	1.51	0.53	1.44	0.93	2.4	TRUE	1.83	-0.81	-0.09	0	-0.03	TCGA-BF-A1PX	Immune stimulation	0.538046
TCGA-BF-A1PZ	SKCM	FALSE	FALSE	0.6	-0.53	0.51	-0.54	-0.52	-0.82	FALSE	-0.4	0.6	0.11	-0.05	0.01	TCGA-BF-A1PZ	Immune anergy	0.11909
TCGA-BF-A1Q0	SKCM	FALSE	FALSE	1.06	1.15	0.54	0.53	1.86	-0.3	FALSE	-0.21	1.06	0.15	0.03	-0.02	TCGA-BF-A1Q0	Immune anergy	0.31847
TCGA-BF-A3DJ	SKCM	FALSE	FALSE	0.07	0.13	0.43	0.05	0.25	-0.78	FALSE	-0.32	0.07	-0.02	0.07	-0.04	TCGA-BF-A3DJ	Immune anergy	0.217779
TCGA-BF-A3DL	SKCM	FALSE	FALSE	0.81	-1.95	0.15	-1.13	-0.91	-1.46	FALSE	1.04	0.81	0.05	0.06	0.02	TCGA-BF-A3DL	Immune anergy	0.359524
TCGA-BF-A3DM	SKCM	TRUE	FALSE	1.68	-1.05	0.77	-1.18	-0.61	-1.49	FALSE	-0.75	1.68	0.16	0.09	0.01	TCGA-BF-A3DM	Immune exclusion	0.0703671
TCGA-BF-A3DN	SKCM	TRUE	FALSE	2.12	-1.21	0.26	-1.08	-0.31	-1.44	FALSE	-1.19	2.12	0.08	0.22	0.02	TCGA-BF-A3DN	Immune anergy	0.162979
TCGA-BF-A5EO	SKCM	FALSE	FALSE	0.36	-0.79	0.14	-0.16	-0.52	-0.3	FALSE	1.83	0.36	0.05	0.03	-0.02	TCGA-BF-A5EO	Immune anergy	0.409936
TCGA-BF-A5EP	SKCM	TRUE	FALSE	1.81	-1.81	0.47	-1.46	-0.74	-1.42	FALSE	-0.63	1.81	0.16	0.07	0.04	TCGA-BF-A5EP	Immune anergy	0.145644
TCGA-BF-A5EQ	SKCM	FALSE	FALSE	0.25	0.45	0.5	0.41	-0.1	0.56	TRUE	0.25	0.21	-0.08	0.11	0.01	TCGA-BF-A5EQ	Immune anergy	0.253191
TCGA-BF-A5ER	SKCM	FALSE	FALSE	0.22	-2.5	0.15	-1.53	-0.81	-1.79	FALSE	0.95	0.22	0.03	-0.05	0.05	TCGA-BF-A5ER	Immune anergy	0.1404
TCGA-BF-A5ES	SKCM	FALSE	TRUE	-0.18	-0.53	0.59	-0.29	-0.44	-0.94	FALSE	0.87	-0.18	-0.08	0.07	0	TCGA-BF-A5ES	Immune anergy	0.242751
TCGA-BF-A9VF	SKCM	FALSE	FALSE	0.06	-2.43	0.38	-1.53	-0.56	-1.54	FALSE	0.03	0.06	0.05	-0.1	0.06	TCGA-BF-A9VF	Immune exclusion	0.0670086
TCGA-BF-AAOU	SKCM	FALSE	FALSE	1.06	-0.41	0.66	-0.34	0.18	-0.97	FALSE	-0.22	1.06	0.08	0.1	-0.02	TCGA-BF-AAOU	Immune anergy	0.396191
TCGA-BF-AAOX	SKCM	FALSE	TRUE	-0.04	-1.87	0.71	-1.35	-0.56	-1.49	FALSE	-0.47	-0.04	0.03	-0.07	0.04	TCGA-BF-AAOX	Immune anergy	0.293761
TCGA-BF-AAP0	SKCM	FALSE	FALSE	1.92	2.27	0.53	1.82	0.9	2.49	TRUE	1.92	-1.32	-0.16	0.02	-0.07	TCGA-BF-AAP0	Immune stimulation	0.676203
TCGA-BF-AAP1	SKCM	TRUE	FALSE	1.21	-1.7	0.38	-1.31	-1.01	-1.62	FALSE	-1.29	1.21	0.12	-0.02	0.09	TCGA-BF-AAP1	Immune exclusion	0.071425
TCGA-BF-AAP2	SKCM	FALSE	FALSE	0.07	-0.12	0.76	-0.22	-0.21	-0.31	FALSE	-0.28	0.07	0.07	-0.1	0.03	TCGA-BF-AAP2	Immune anergy	0.131007
TCGA-BF-AAP4	SKCM	FALSE	FALSE	0.62	1.13	0.48	1.03	0.42	1.69	TRUE	0.62	-0.84	-0.01	-0.07	-0.06	TCGA-BF-AAP4	Immune anergy	0.403742
TCGA-BF-AAP6	SKCM	TRUE	FALSE	1.79	-1.48	0.44	-1.23	-0.76	-1.69	FALSE	-1.23	1.79	0.14	0.07	0.06	TCGA-BF-AAP6	Immune anergy	0.103589
TCGA-BF-AAP7	SKCM	FALSE	FALSE	2.02	0.98	0.31	1.31	0.24	1.76	TRUE	2.02	-0.55	-0.06	0.02	-0.04	TCGA-BF-AAP7	Immune stimulation	0.494773
TCGA-BF-AAP8	SKCM	FALSE	TRUE	-0.43	-1.5	0.67	-0.82	-0.18	-0.45	FALSE	-0.9	-0.43	-0.07	-0.04	0.05	TCGA-BF-AAP8	Immune anergy	0.118079
TCGA-D3-A1Q1	SKCM	FALSE	FALSE	0.98	-2.1	0.07	-1.64	-0.89	-1.57	FALSE	-1.45	0.98	0.06	-0.02	0.12	TCGA-D3-A1Q1	Immune exclusion	0.0626401
TCGA-D3-A1Q3	SKCM	FALSE	TRUE	-1.12	0.53	0.73	0.53	0.33	0.54	FALSE	-0.52	-1.12	-0.12	-0.04	-0.02	TCGA-D3-A1Q3	Immune anergy	0.283856
TCGA-D3-A1Q4	SKCM	FALSE	FALSE	2.67	-0.8	0.25	-0.64	-0.79	-1.19	FALSE	-0.14	2.67	0.08	0.27	0.07	TCGA-D3-A1Q4	Immune anergy	0.275411
TCGA-D3-A1Q5	SKCM	TRUE	FALSE	2.48	-1.84	0.28	-1.36	-0.9	-0.71	FALSE	-0.27	2.48	0.14	0.19	0.05	TCGA-D3-A1Q5	Immune exclusion	0.0566659
TCGA-D3-A1Q6	SKCM	FALSE	FALSE	0.97	-0.49	0.83	-0.87	-0.5	-1	FALSE	-0.75	0.97	0.17	0.02	-0.04	TCGA-D3-A1Q6	Immune anergy	0.38223
TCGA-D3-A1Q7	SKCM	FALSE	FALSE	0.91	3.45	0.69	2.49	1.89	2.9	TRUE	0.91	-1.92	-0.19	0.02	-0.13	TCGA-D3-A1Q7	Immune stimulation	0.488596
TCGA-D3-A1Q8	SKCM	FALSE	FALSE	2.42	-0.92	0.1	-0.59	-0.85	-0.91	FALSE	0.19	2.42	0.04	0.29	0.05	TCGA-D3-A1Q8	Immune anergy	0.412874
TCGA-D3-A1Q9	SKCM	FALSE	TRUE	-0.45	0.04	0.45	0.1	0.72	0.36	FALSE	-0.49	-0.45	-0.03	-0.04	0	TCGA-D3-A1Q9	Immune anergy	0.229635
TCGA-D3-A1QA	SKCM	FALSE	TRUE	-0.11	0.33	0.68	-0.1	-0.45	-0.1	FALSE	-1.23	-0.11	0.07	-0.14	0.05	TCGA-D3-A1QA	Immune anergy	0.302453
TCGA-D3-A1QB	SKCM	FALSE	FALSE	0.96	2.85	0.65	2.23	0.94	3.17	TRUE	0.96	-2.46	-0.19	-0.1	-0.1	TCGA-D3-A1QB	Immune stimulation	0.445848
TCGA-D3-A2J6	SKCM	FALSE	TRUE	-0.12	0.45	0.63	0.46	-0.3	1.18	TRUE	-0.12	-0.48	0.01	-0.04	-0.05	TCGA-D3-A2J6	Immune anergy	0.288796
TCGA-D3-A2J7	SKCM	FALSE	FALSE	0.18	0.84	0.73	0.72	0.98	0.75	TRUE	0.18	-0.06	-0.04	0.11	-0.08	TCGA-D3-A2J7	Immune anergy	0.461597
TCGA-D3-A2J8	SKCM	FALSE	FALSE	1.66	2.58	0.58	2.18	2.77	2.31	TRUE	1.66	-0.68	0	-0.01	-0.1	TCGA-D3-A2J8	Immune stimulation	0.645704
TCGA-D3-A2J9	SKCM	FALSE	FALSE	2.11	3.13	0.51	2.75	1.46	4	TRUE	2.11	-3.18	-0.25	-0.13	-0.11	TCGA-D3-A2J9	Immune stimulation	0.666939
TCGA-D3-A2JA	SKCM	FALSE	FALSE	1.16	1.05	0.17	0.64	1.01	0.06	FALSE	0.57	1.16	0.02	0.22	-0.06	TCGA-D3-A2JA	Immune anergy	0.35274
TCGA-D3-A2JC	SKCM	FALSE	FALSE	0.36	1.54	0.62	1.03	0.57	0.85	TRUE	0.36	-0.17	0	0.07	-0.1	TCGA-D3-A2JC	Immune anergy	0.359238
TCGA-D3-A2JD	SKCM	FALSE	TRUE	-0.26	-1.31	0.1	-0.25	-0.54	-0.14	FALSE	2.09	-0.26	-0.05	-0.02	0.04	TCGA-D3-A2JD	Immune anergy	0.454619
TCGA-D3-A2JE	SKCM	TRUE	FALSE	1.5	-1.77	0.54	-1.61	-1.12	-1.67	FALSE	-2.05	1.5	0.18	-0.07	0.11	TCGA-D3-A2JE	Immune anergy	0.107371
TCGA-D3-A2JF	SKCM	FALSE	FALSE	0.68	1.89	0.68	1.21	1.01	0.98	TRUE	0.68	-0.76	-0.01	-0.02	-0.09	TCGA-D3-A2JF	Immune stimulation	0.300303
TCGA-D3-A2JG	SKCM	FALSE	FALSE	0.81	-1.35	0.65	-1.18	-0.92	-1.24	FALSE	-1.26	0.81	0.09	0.04	0	TCGA-D3-A2JG	Immune anergy	0.195132
TCGA-D3-A2JH	SKCM	FALSE	FALSE	0.51	2.59	0.65	2.21	0.93	3.78	TRUE	0.51	-1.81	-0.05	-0.16	-0.07	TCGA-D3-A2JH	Immune stimulation	0.614385
TCGA-D3-A2JK	SKCM	FALSE	FALSE	0.27	-2.28	0.15	-1.25	-1.06	-1.64	FALSE	1.73	0.27	-0.01	0.02	0.04	TCGA-D3-A2JK	Immune anergy	0.309485
TCGA-D3-A2JL	SKCM	FALSE	FALSE	0.58	1.56	0.6	1.24	0.29	2.22	TRUE	0.58	-1.19	-0.06	-0.1	-0.03	TCGA-D3-A2JL	Immune stimulation	0.362056
TCGA-D3-A2JN	SKCM	FALSE	FALSE	0.4	0.63	0.34	0.61	-0.52	1.22	TRUE	0.4	1.19	0.08	0.11	0	TCGA-D3-A2JN	Immune anergy	0.412289
TCGA-D3-A2JO	SKCM	FALSE	FALSE	0.45	2.19	0.55	1.84	1.44	2.25	TRUE	0.45	-1.58	-0.05	-0.12	-0.09	TCGA-D3-A2JO	Immune stimulation	0.476526
TCGA-D3-A2JP	SKCM	FALSE	FALSE	0.15	0.77	0.72	0.61	-0.54	0.92	TRUE	0.15	0.39	0.01	0.05	-0.01	TCGA-D3-A2JP	Immune anergy	0.305245
TCGA-D3-A3BZ	SKCM	FALSE	FALSE	1.72	1.3	0.3	1.12	0.4	1.51	TRUE	1.72	0.24	-0.09	0.2	-0.07	TCGA-D3-A3BZ	Immune stimulation	0.547074
TCGA-D3-A3C6	SKCM	FALSE	FALSE	2.06	-0.58	0.46	-1.33	-0.91	-1.77	FALSE	-2.02	2.06	0.19	0.08	0.04	TCGA-D3-A3C6	Immune anergy	0.116597
TCGA-D3-A3C7	SKCM	FALSE	FALSE	0.99	0.35	0.28	0.61	-0.59	0.83	TRUE	0.99	-0.04	0	0.06	-0.05	TCGA-D3-A3C7	Immune anergy	0.22213
TCGA-D3-A3C8	SKCM	FALSE	FALSE	1.94	4.36	0.81	3.42	2.77	4.71	TRUE	1.94	-2.52	-0.16	-0.08	-0.15	TCGA-D3-A3C8	Immune stimulation	0.7166
TCGA-D3-A3CB	SKCM	FALSE	FALSE	2.02	1.76	0.5	2.31	4.22	3.25	TRUE	2.02	-2.49	-0.25	-0.08	-0.06	TCGA-D3-A3CB	Immune stimulation	0.579958
TCGA-D3-A3CC	SKCM	FALSE	FALSE	0.78	-1.36	0.46	-1.22	-0.9	-1.59	FALSE	-0.97	0.78	-0.05	0.1	0.08	TCGA-D3-A3CC	Immune anergy	0.216124
TCGA-D3-A3CE	SKCM	FALSE	FALSE	0.18	1.52	0.64	1.16	0.26	1.77	TRUE	0.18	-0.39	-0.01	-0.04	-0.02	TCGA-D3-A3CE	Immune anergy	0.251261
TCGA-D3-A3CF	SKCM	FALSE	FALSE	0.71	0.95	0.72	0.68	-0.01	0.5	TRUE	0.71	-1.04	-0.13	-0.03	-0.01	TCGA-D3-A3CF	Immune anergy	0.537248
TCGA-D3-A3ML	SKCM	FALSE	FALSE	0.34	-1.98	0.5	-1.79	-1.08	-1.76	FALSE	-2.06	0.34	0.09	-0.08	0.05	TCGA-D3-A3ML	Immune exclusion	0.0292274
TCGA-D3-A3MO	SKCM	TRUE	FALSE	2.47	-2.46	0.3	-1.82	-1.13	-1.84	FALSE	-1.09	2.47	0.19	0.15	0.05	TCGA-D3-A3MO	Immune anergy	0.111851
TCGA-D3-A3MR	SKCM	FALSE	FALSE	1.09	1.82	0.55	1.58	0.84	2.5	TRUE	1.09	-1.08	-0.07	-0.01	-0.08	TCGA-D3-A3MR	Immune stimulation	0.562361
TCGA-D3-A3MU	SKCM	FALSE	FALSE	1.19	0.13	0.22	-0.15	-0.16	-0.77	FALSE	0.81	1.19	-0.01	0.23	-0.03	TCGA-D3-A3MU	Immune anergy	0.145834
TCGA-D3-A3MV	SKCM	TRUE	FALSE	2.27	-1.65	0.47	-1.35	-0.93	-1.23	FALSE	-0.96	2.27	0.25	0.05	0.05	TCGA-D3-A3MV	Immune anergy	0.18305
TCGA-D3-A51E	SKCM	FALSE	TRUE	-0.19	1.98	0.83	1.22	0.66	1	TRUE	-0.19	-1.46	-0.01	-0.12	-0.11	TCGA-D3-A51E	Immune stimulation	0.227878
TCGA-D3-A51F	SKCM	FALSE	FALSE	2.56	3.37	0.61	3.06	1.6	4.25	TRUE	2.56	-2.58	-0.26	0.01	-0.14	TCGA-D3-A51F	Immune stimulation	0.769626
TCGA-D3-A51H	SKCM	FALSE	FALSE	2.02	1.67	0.58	1.46	0.33	1.02	TRUE	2.02	-3.18	-0.21	-0.24	-0.05	TCGA-D3-A51H	Immune stimulation	0.950331
TCGA-D3-A51J	SKCM	FALSE	FALSE	0.91	1.88	0.67	1.75	0.91	2.6	TRUE	0.91	-1.55	-0.12	-0.06	-0.06	TCGA-D3-A51J	Immune stimulation	0.415756
TCGA-D3-A51K	SKCM	FALSE	FALSE	0.83	-0.57	0.22	0.27	-0.39	0.22	TRUE	0.83	-0.48	0.03	-0.13	0.03	TCGA-D3-A51K	Immune anergy	0.165992
TCGA-D3-A51N	SKCM	FALSE	TRUE	-0.75	1.14	0.66	0.3	0.45	-0.65	FALSE	0.25	-0.75	-0.02	0.01	-0.1	TCGA-D3-A51N	Immune anergy	0.288552
TCGA-D3-A51R	SKCM	TRUE	FALSE	2.5	-2.45	0.24	-2.09	-1.17	-1.83	FALSE	-1.17	2.5	0.26	0.02	0.1	TCGA-D3-A51R	Immune exclusion	0.0604242
TCGA-D3-A51T	SKCM	FALSE	TRUE	-0.14	0.27	0.51	0.05	-0.2	-0.42	FALSE	-0.89	-0.14	0.07	-0.06	-0.04	TCGA-D3-A51T	Immune anergy	0.188196
TCGA-D3-A5GL	SKCM	TRUE	FALSE	1.16	-1.96	0.71	-1.41	-0.27	-1.55	FALSE	-1.27	1.16	0.11	0.01	0.05	TCGA-D3-A5GL	Immune anergy	0.183831
TCGA-D3-A5GN	SKCM	FALSE	TRUE	-1.18	1.45	0.43	0.58	0.28	0.74	TRUE	-1.18	1.87	0.19	0.12	-0.02	TCGA-D3-A5GN	Immune anergy	0.274761
TCGA-D3-A5GO	SKCM	FALSE	TRUE	-0.09	1.6	0.47	0.72	-0.2	0.1	FALSE	0.55	-0.09	0.01	0.06	-0.09	TCGA-D3-A5GO	Immune anergy	0.21717
TCGA-D3-A5GR	SKCM	FALSE	FALSE	0.25	1.16	0.44	0.61	0.45	0.32	TRUE	0.25	0.45	0.04	0.07	-0.04	TCGA-D3-A5GR	Immune anergy	0.462397
TCGA-D3-A5GS	SKCM	FALSE	TRUE	-0.22	1.22	0.62	0.63	0.09	0.69	FALSE	0.08	-0.22	-0.06	0.06	-0.03	TCGA-D3-A5GS	Immune anergy	0.17465
TCGA-D3-A5GT	SKCM	FALSE	TRUE	-0.4	-2.73	0.17	-1.94	-1.13	-1.87	FALSE	-0.77	-0.4	0	-0.13	0.08	TCGA-D3-A5GT	Immune exclusion	0.068287
TCGA-D3-A5GU	SKCM	FALSE	TRUE	-0.79	1.08	0.54	0.64	-0.3	0.83	FALSE	-1.07	-0.79	-0.05	-0.09	0.02	TCGA-D3-A5GU	Immune stimulation	0.1669
TCGA-D3-A8GB	SKCM	FALSE	FALSE	1.9	1.7	0.5	1.26	-0.09	1.72	TRUE	1.9	-1.08	-0.14	0.05	-0.07	TCGA-D3-A8GB	Immune stimulation	0.578865
TCGA-D3-A8GC	SKCM	FALSE	TRUE	-0.11	-0.69	0.72	-0.59	0.34	-1.11	FALSE	-1.56	-0.11	0.04	-0.05	-0.01	TCGA-D3-A8GC	Immune anergy	0.127606
TCGA-D3-A8GD	SKCM	FALSE	FALSE	1.49	2.49	0.68	2.19	1.07	2.26	TRUE	1.49	-2.7	-0.11	-0.22	-0.1	TCGA-D3-A8GD	Immune stimulation	0.565513
TCGA-D3-A8GE	SKCM	FALSE	FALSE	1.23	1.03	0.28	0.47	-0.19	0.31	FALSE	1.01	1.23	-0.1	0.27	0.02	TCGA-D3-A8GE	Immune anergy	0.355776
TCGA-D3-A8GI	SKCM	FALSE	FALSE	0.8	-1.84	0.07	-1.26	-1.03	-1.69	FALSE	1.34	0.8	0.03	0.1	0.01	TCGA-D3-A8GI	Immune anergy	0.0955347
TCGA-D3-A8GJ	SKCM	FALSE	FALSE	0.71	3.53	0.78	2.45	1.96	3.18	TRUE	0.71	-2.31	-0.12	-0.09	-0.15	TCGA-D3-A8GJ	Immune stimulation	0.46835
TCGA-D3-A8GK	SKCM	TRUE	FALSE	1.09	-2.44	0.53	-1.78	-1.03	-1.68	FALSE	-0.81	1.09	0.16	-0.08	0.08	TCGA-D3-A8GK	Immune exclusion	0.0658536
TCGA-D3-A8GL	SKCM	FALSE	FALSE	0.83	-2.11	0.53	-1.73	-0.81	-1.87	FALSE	-1.96	0.83	0.12	-0.06	0.07	TCGA-D3-A8GL	Immune exclusion	0.0456767
TCGA-D3-A8GM	SKCM	FALSE	TRUE	-0.47	0.77	0.84	0.37	0.78	0.28	TRUE	-0.47	-0.79	-0.04	-0.03	-0.06	TCGA-D3-A8GM	Immune anergy	0.344462
TCGA-D3-A8GN	SKCM	FALSE	FALSE	0.57	1.97	0.68	1.36	0.73	1.76	TRUE	0.57	-0.97	-0.06	0.01	-0.1	TCGA-D3-A8GN	Immune stimulation	0.499165
TCGA-D3-A8GP	SKCM	FALSE	FALSE	0.64	-1.07	0.44	-0.87	-0.84	-0.87	FALSE	-1.71	0.64	0.12	-0.04	0.02	TCGA-D3-A8GP	Immune exclusion	0.0455955
TCGA-D3-A8GQ	SKCM	TRUE	FALSE	1.93	-1.04	0.32	-0.89	-0.81	-0.74	FALSE	-0.12	1.93	0.17	0.05	0.06	TCGA-D3-A8GQ	Immune anergy	0.32108
TCGA-D3-A8GS	SKCM	FALSE	FALSE	0.69	1.15	0.92	1.15	0.39	1.3	TRUE	0.69	-2.06	-0.03	-0.22	-0.08	TCGA-D3-A8GS	Immune stimulation	0.436071
TCGA-D3-A8GV	SKCM	TRUE	FALSE	1.49	-1.6	0.83	-1.11	-0.54	-1.22	FALSE	-0.79	1.49	0.2	-0.03	0.04	TCGA-D3-A8GV	Immune exclusion	0.0502509
TCGA-D9-A148	SKCM	FALSE	TRUE	-0.42	0.14	0.46	-0.11	0.74	0.07	FALSE	0.19	-0.42	-0.03	-0.04	0	TCGA-D9-A148	Immune anergy	0.168732
TCGA-D9-A149	SKCM	FALSE	FALSE	0.2	1.07	0.61	0.93	0.42	0.63	TRUE	0.2	-1.33	-0.08	-0.04	-0.08	TCGA-D9-A149	Immune anergy	0.268463
TCGA-D9-A1JW	SKCM	FALSE	FALSE	1.04	0.91	0.43	0.92	0.41	1.05	TRUE	1.04	-1.7	-0.14	-0.09	-0.03	TCGA-D9-A1JW	Immune anergy	0.352809
TCGA-D9-A1JX	SKCM	FALSE	TRUE	-0.13	0.98	0.25	0.97	0.3	1.89	TRUE	-0.13	-0.92	-0.03	-0.06	-0.05	TCGA-D9-A1JX	Immune anergy	0.212511
TCGA-D9-A1X3	SKCM	TRUE	FALSE	1.31	-2.44	0.53	-1.76	-0.93	-1.9	FALSE	-1.29	1.31	0.06	0.07	0.07	TCGA-D9-A1X3	Immune exclusion	0.0498977
TCGA-D9-A3Z1	SKCM	FALSE	TRUE	-0.04	1.21	0.9	1.16	0.26	1.48	TRUE	-0.04	-2.32	-0.17	-0.12	-0.06	TCGA-D9-A3Z1	Immune stimulation	0.541313
TCGA-D9-A3Z3	SKCM	FALSE	TRUE	-0.67	0.41	0.35	0.53	0.14	0.04	FALSE	1.45	-0.67	-0.1	0.01	-0.01	TCGA-D9-A3Z3	Immune anergy	0.366695
TCGA-D9-A3Z4	SKCM	FALSE	FALSE	0.24	0.99	0.36	0.24	0.13	0.03	FALSE	-0.85	0.24	-0.02	0.06	-0.01	TCGA-D9-A3Z4	Immune anergy	0.178451
TCGA-D9-A4Z2	SKCM	TRUE	FALSE	1.36	-1.05	0.42	-1	-0.73	-1.51	FALSE	-1.23	1.36	0.07	0.09	0.06	TCGA-D9-A4Z2	Immune anergy	0.110493
TCGA-D9-A4Z3	SKCM	FALSE	FALSE	0.09	-1.31	0.75	-1.09	-0.91	-0.94	FALSE	-1.02	0.09	0.06	-0.11	0.06	TCGA-D9-A4Z3	Immune anergy	0.152531
TCGA-D9-A4Z5	SKCM	FALSE	FALSE	0.37	-1.13	0.28	-0.94	-0.61	-1.56	FALSE	0.23	0.37	-0.05	0.14	-0.02	TCGA-D9-A4Z5	Immune exclusion	0.0549533
TCGA-D9-A4Z6	SKCM	FALSE	FALSE	0.67	-1.74	0.19	-1.32	-0.59	-1.08	FALSE	-0.69	0.67	0.05	0.02	0.03	TCGA-D9-A4Z6	Immune anergy	0.206572
TCGA-D9-A6E9	SKCM	FALSE	FALSE	2.56	2.29	0.45	2.65	2.07	3.76	TRUE	2.56	-2.75	-0.19	-0.11	-0.12	TCGA-D9-A6E9	Immune stimulation	0.449093
TCGA-D9-A6EA	SKCM	FALSE	FALSE	0.76	-0.74	0.59	-0.97	-0.56	-1.52	FALSE	-0.93	0.76	0.12	-0.03	0.02	TCGA-D9-A6EA	Immune anergy	0.0975692
TCGA-D9-A6EC	SKCM	FALSE	FALSE	0.75	-0.48	0.67	-0.79	-0.02	-1.61	FALSE	-1.37	0.75	0.09	0.01	0	TCGA-D9-A6EC	Immune exclusion	0.0399368
TCGA-D9-A6EG	SKCM	FALSE	FALSE	0.3	-2.34	0.62	-1.91	-1	-1.86	FALSE	-1.11	0.3	-0.01	0.01	0.05	TCGA-D9-A6EG	Immune exclusion	0.058041
TCGA-DA-A1HV	SKCM	FALSE	FALSE	0.35	2.3	0.49	1.6	0.57	1.69	TRUE	0.35	-2.02	-0.07	-0.14	-0.12	TCGA-DA-A1HV	Immune stimulation	0.278028
TCGA-DA-A1HW	SKCM	FALSE	FALSE	0.46	1.95	0.3	1.28	0.76	1.79	TRUE	0.46	-1.7	-0.11	-0.1	-0.06	TCGA-DA-A1HW	Immune anergy	0.377264
TCGA-DA-A1HY	SKCM	TRUE	FALSE	1.95	-1.23	0.46	-1.28	-0.01	-1.59	FALSE	-0.36	1.95	0.14	0.2	-0.04	TCGA-DA-A1HY	Immune anergy	0.156592
TCGA-DA-A1I0	SKCM	FALSE	FALSE	0.16	-1.53	0.13	-0.38	-0.93	-0.54	FALSE	1.61	0.16	-0.01	0	0.04	TCGA-DA-A1I0	Immune anergy	0.433944
TCGA-DA-A1I1	SKCM	FALSE	FALSE	0.19	1.78	0.56	1.08	0.91	0.45	TRUE	0.19	-0.72	-0.1	0.13	-0.13	TCGA-DA-A1I1	Immune anergy	0.312696
TCGA-DA-A1I2	SKCM	FALSE	FALSE	0.11	1.82	0.63	0.35	-0.05	-0.37	FALSE	-0.77	0.11	-0.01	0.08	-0.06	TCGA-DA-A1I2	Immune anergy	0.149508
TCGA-DA-A1I4	SKCM	FALSE	FALSE	0.23	-0.95	0.66	-0.71	-0.39	-1.21	FALSE	-0.24	0.23	-0.15	0.17	0.02	TCGA-DA-A1I4	Immune anergy	0.410016
TCGA-DA-A1I5	SKCM	FALSE	FALSE	0.72	1.2	0.62	0.99	1.61	1	TRUE	0.72	-0.81	-0.11	0.05	-0.06	TCGA-DA-A1I5	Immune stimulation	0.423134
TCGA-DA-A1I7	SKCM	FALSE	FALSE	2.06	-0.26	0.11	-0.35	-0.77	-0.56	FALSE	0.16	2.06	0.14	0.21	-0.03	TCGA-DA-A1I7	Immune anergy	0.211441
TCGA-DA-A1I8	SKCM	FALSE	FALSE	0.96	-1.46	0.52	-1.27	-0.8	-1.69	FALSE	0.29	0.96	0.07	0.11	-0.03	TCGA-DA-A1I8	Immune anergy	0.193452
TCGA-DA-A1IA	SKCM	FALSE	FALSE	0.14	-2.34	0.09	-1.56	-0.55	-1.48	FALSE	1.12	0.14	0.04	-0.04	0.04	TCGA-DA-A1IA	Immune exclusion	0.0690913
TCGA-DA-A1IB	SKCM	FALSE	FALSE	2.16	2.4	0.6	2.13	1.38	2.52	TRUE	2.16	-3.18	-0.28	-0.13	-0.08	TCGA-DA-A1IB	Immune stimulation	0.740368
TCGA-DA-A1IC	SKCM	FALSE	FALSE	0.28	-0.52	0.38	-0.49	0.1	-0.54	FALSE	-0.33	0.28	-0.03	0.05	0.04	TCGA-DA-A1IC	Immune anergy	0.162792
TCGA-DA-A3F2	SKCM	FALSE	FALSE	3.54	0.27	0.11	2.13	-0.44	3.35	TRUE	3.54	-1.76	-0.29	0.08	-0.03	TCGA-DA-A3F2	Immune stimulation	0.782557
TCGA-DA-A3F3	SKCM	FALSE	FALSE	0.14	-0.11	0.64	-0.55	0.15	-0.77	FALSE	-1.95	0.14	0.07	-0.08	0.04	TCGA-DA-A3F3	Immune exclusion	0.0465912
TCGA-DA-A3F5	SKCM	TRUE	FALSE	1.69	-1.92	0.39	-1.15	-0.71	-1.15	FALSE	-0.34	1.69	0.24	0.05	-0.03	TCGA-DA-A3F5	Immune anergy	0.363818
TCGA-DA-A3F8	SKCM	FALSE	FALSE	1.85	3.2	0.82	2.76	2.67	3.72	TRUE	1.85	-3.03	-0.23	-0.07	-0.16	TCGA-DA-A3F8	Immune stimulation	0.549772
TCGA-DA-A95V	SKCM	FALSE	FALSE	1.3	0.35	0.43	0.74	1.3	0.8	TRUE	1.3	-1.17	-0.08	-0.07	-0.02	TCGA-DA-A95V	Immune anergy	0.293138
TCGA-DA-A95W	SKCM	FALSE	TRUE	-0.06	-0.16	0.84	-0.14	0.12	0.07	FALSE	-0.97	-0.06	0.03	-0.11	0.07	TCGA-DA-A95W	Immune anergy	0.107893
TCGA-DA-A95X	SKCM	FALSE	FALSE	0.26	0.67	0.76	0.07	0.64	-0.27	FALSE	-0.95	0.26	0.06	0.02	-0.05	TCGA-DA-A95X	Immune anergy	0.163409
TCGA-DA-A95Y	SKCM	FALSE	TRUE	-0.05	-1.9	0.49	-1.36	-0.87	-1.6	FALSE	-0.05	-0.05	0.04	-0.08	0.03	TCGA-DA-A95Y	Immune anergy	0.124394
TCGA-DA-A95Z	SKCM	FALSE	FALSE	0.17	-0.48	0.67	-0.73	-0.37	-1.05	FALSE	-1.37	0.17	0.07	-0.1	0.04	TCGA-DA-A95Z	Immune exclusion	0.0858059
TCGA-DA-A960	SKCM	FALSE	TRUE	-1.02	-2.69	0.15	-2.03	-0.81	-1.89	FALSE	0.54	-1.02	-0.03	-0.16	0.05	TCGA-DA-A960	Immune exclusion	0.0653151
TCGA-EB-A1NK	SKCM	FALSE	FALSE	0.75	-1.16	0.42	-0.75	-0.71	-1.18	FALSE	0.6	0.75	0.01	0.07	0.05	TCGA-EB-A1NK	Immune anergy	0.285945
TCGA-EB-A24C	SKCM	FALSE	FALSE	0.89	-1.59	0.49	-1.39	-0.86	-1.83	FALSE	-1.2	0.89	0.02	0.1	0.02	TCGA-EB-A24C	Immune exclusion	0.0816899
TCGA-EB-A24D	SKCM	FALSE	FALSE	0.05	-0.2	0.63	-0.4	-0.63	-1.11	FALSE	-1.59	0.05	0.02	-0.04	0.04	TCGA-EB-A24D	Immune anergy	0.116471
TCGA-EB-A299	SKCM	FALSE	FALSE	0.41	-0.07	0.61	-0.13	-0.42	-0.2	FALSE	0.86	0.41	0.02	0.04	0	TCGA-EB-A299	Immune anergy	0.229057
TCGA-EB-A3HV	SKCM	FALSE	FALSE	0.62	-1.5	0.2	-0.73	-0.77	-1.35	FALSE	1.51	0.62	-0.03	0.1	0.03	TCGA-EB-A3HV	Immune anergy	0.116863
TCGA-EB-A3XB	SKCM	FALSE	TRUE	-0.22	-0.56	0.73	-0.18	0.49	-0.56	FALSE	-0.8	-0.22	-0.02	-0.02	0.01	TCGA-EB-A3XB	Immune anergy	0.39506
TCGA-EB-A3XC	SKCM	FALSE	FALSE	0.97	-0.06	0.63	-0.5	-0.86	-1	FALSE	-0.47	0.97	0.13	-0.03	0.03	TCGA-EB-A3XC	Immune anergy	0.18053
TCGA-EB-A3XD	SKCM	FALSE	TRUE	-0.44	0.16	0.48	0.44	-0.14	0.52	FALSE	1.94	-0.44	-0.11	0.03	0.03	TCGA-EB-A3XD	Immune anergy	0.452345
TCGA-EB-A3XE	SKCM	FALSE	FALSE	0.51	0.19	0.44	0.17	-0.88	-0.09	FALSE	1.05	0.51	-0.02	0.07	0.04	TCGA-EB-A3XE	Immune anergy	0.253955
TCGA-EB-A3XF	SKCM	FALSE	TRUE	-0.05	1.66	0.68	0.3	1.09	-1.06	FALSE	-0.79	-0.05	-0.01	0.06	-0.08	TCGA-EB-A3XF	Immune anergy	0.2432
TCGA-EB-A3Y6	SKCM	FALSE	FALSE	1.23	0.14	0.52	-0.3	-0.17	-0.5	FALSE	-1.21	1.23	0.03	0.13	0.03	TCGA-EB-A3Y6	Immune anergy	0.282147
TCGA-EB-A3Y7	SKCM	FALSE	FALSE	0.2	-2.38	0.24	-1.31	-0.56	-1.75	FALSE	1.19	0.2	0.01	-0.02	0.04	TCGA-EB-A3Y7	Immune anergy	0.383006
TCGA-EB-A41A	SKCM	FALSE	FALSE	0.63	-0.61	0.63	-0.87	-0.89	-1.29	FALSE	-1.36	0.63	0.07	-0.02	0.04	TCGA-EB-A41A	Immune exclusion	0.085965
TCGA-EB-A41B	SKCM	FALSE	TRUE	-0.18	-0.69	0.74	-0.6	-0.24	-0.23	FALSE	-0.77	-0.18	0.06	-0.15	0.05	TCGA-EB-A41B	Immune anergy	0.106486
TCGA-EB-A42Y	SKCM	FALSE	FALSE	1.24	-0.88	0.64	-0.59	-0.43	-1.12	FALSE	-0.37	1.24	0.1	0.08	0	TCGA-EB-A42Y	Immune anergy	0.106005
TCGA-EB-A42Z	SKCM	FALSE	FALSE	1.72	-0.24	0.43	-0.3	-0.45	-0.82	FALSE	-0.41	1.72	0.08	0.15	0.04	TCGA-EB-A42Z	Immune anergy	0.105112
TCGA-EB-A430	SKCM	FALSE	FALSE	0.43	0.17	0.53	-0.01	-0.16	0.15	FALSE	-0.73	0.43	0.06	-0.02	0.02	TCGA-EB-A430	Immune anergy	0.31394
TCGA-EB-A431	SKCM	FALSE	TRUE	-0.23	-0.86	0.77	-0.97	-0.2	-1.41	FALSE	-1.18	-0.23	0.06	-0.1	0	TCGA-EB-A431	Immune anergy	0.293611
TCGA-EB-A44N	SKCM	FALSE	FALSE	0.35	0.27	0.75	-0.01	-0.19	-0.28	FALSE	0.29	0.35	0	0.03	0.02	TCGA-EB-A44N	Immune anergy	0.433701
TCGA-EB-A44O	SKCM	FALSE	FALSE	0.77	-1.04	0.73	-0.98	0.04	-1.29	FALSE	-1.78	0.77	0.08	-0.01	0.04	TCGA-EB-A44O	Immune anergy	0.143225
TCGA-EB-A44P	SKCM	FALSE	FALSE	1.08	-0.28	0.81	-0.19	0.82	-0.58	FALSE	-1.11	1.08	0.11	0.06	-0.01	TCGA-EB-A44P	Immune anergy	0.211486
TCGA-EB-A44Q	SKCM	FALSE	FALSE	0.3	2.1	0.8	1.53	0.64	1.62	TRUE	0.3	-2.61	-0.16	-0.16	-0.09	TCGA-EB-A44Q	Immune stimulation	0.336202
TCGA-EB-A44R	SKCM	FALSE	FALSE	0.24	0.15	0.31	0.48	-0.47	1.6	FALSE	-0.26	0.24	0.02	-0.03	0.05	TCGA-EB-A44R	Immune anergy	0.264026
TCGA-EB-A4IQ	SKCM	FALSE	FALSE	0.25	-2.04	0.27	-1.32	-0.38	-1.6	FALSE	0.41	0.25	0.04	-0.03	0.03	TCGA-EB-A4IQ	Immune anergy	0.242185
TCGA-EB-A4IS	SKCM	FALSE	FALSE	1.6	1.85	0.44	1.41	0.84	1.78	TRUE	1.6	-0.79	-0.1	0.06	-0.08	TCGA-EB-A4IS	Immune stimulation	0.439669
TCGA-EB-A4OY	SKCM	FALSE	TRUE	-0.66	-1.87	0.15	-0.7	-0.98	-0.51	FALSE	1.03	-0.66	-0.05	-0.1	0.06	TCGA-EB-A4OY	Immune anergy	0.26521
TCGA-EB-A4OZ	SKCM	FALSE	FALSE	2.23	0.77	0.24	1.05	-0.35	1.41	TRUE	2.23	-0.8	-0.04	-0.05	-0.03	TCGA-EB-A4OZ	Immune stimulation	0.524242
TCGA-EB-A4P0	SKCM	FALSE	FALSE	0.93	-0.53	0.55	-0.19	-0.41	-0.43	FALSE	-0.76	0.93	0.03	0.03	0.07	TCGA-EB-A4P0	Immune anergy	0.113803
TCGA-EB-A4XL	SKCM	FALSE	FALSE	0.17	0.88	0.74	0.12	0.07	0.05	FALSE	-0.01	0.17	-0.01	0.04	0	TCGA-EB-A4XL	Immune anergy	0.157476
TCGA-EB-A51B	SKCM	FALSE	FALSE	0.41	1.26	0.69	0.31	-0.2	-0.81	FALSE	-1.37	0.41	0.1	-0.04	-0.01	TCGA-EB-A51B	Immune stimulation	0.17089
TCGA-EB-A550	SKCM	FALSE	FALSE	0.25	-0.77	0.81	-0.77	0.31	-1.14	FALSE	0.11	0.25	0	0.03	0	TCGA-EB-A550	Immune anergy	0.310338
TCGA-EB-A551	SKCM	FALSE	FALSE	0.38	2.33	0.81	1.7	1.97	2.11	TRUE	0.38	-1.82	-0.11	-0.07	-0.09	TCGA-EB-A551	Immune stimulation	0.434078
TCGA-EB-A553	SKCM	FALSE	TRUE	-0.9	-1.22	0.09	-0.97	-0.93	-0.91	FALSE	0.77	-0.9	-0.05	-0.11	0.03	TCGA-EB-A553	Immune anergy	0.262798
TCGA-EB-A57M	SKCM	TRUE	FALSE	1.01	-1.08	0.1	-0.47	-0.87	-1.19	FALSE	1.51	1.01	-0.02	0.15	0.04	TCGA-EB-A57M	Immune anergy	0.200827
TCGA-EB-A5FP	SKCM	FALSE	FALSE	0.97	-2.02	0.55	-1.74	-0.6	-1.77	FALSE	-1.72	0.97	0.15	-0.05	0.05	TCGA-EB-A5FP	Immune anergy	0.0919957
TCGA-EB-A5KH	SKCM	FALSE	FALSE	0.74	-2.21	0.16	-1.47	-1.13	-1.68	FALSE	0.47	0.74	0.01	0.03	0.09	TCGA-EB-A5KH	Immune exclusion	0.0666063
TCGA-EB-A5SE	SKCM	FALSE	FALSE	0.93	-1.14	0.56	-1.04	-0.25	-1.09	FALSE	-1.17	0.93	0.09	-0.01	0.06	TCGA-EB-A5SE	Immune exclusion	0.0802026
TCGA-EB-A5SF	SKCM	FALSE	TRUE	-0.33	-2.7	0.22	-1.69	-1.12	-1.83	FALSE	1.62	-0.33	-0.05	-0.01	0.03	TCGA-EB-A5SF	Immune anergy	0.157804
TCGA-EB-A5SG	SKCM	FALSE	FALSE	1.37	3.7	0.91	2.79	1.79	3.72	TRUE	1.37	-2.91	-0.21	-0.1	-0.13	TCGA-EB-A5SG	Immune stimulation	0.691773
TCGA-EB-A5SH	SKCM	FALSE	TRUE	-0.42	-1.41	0.1	-0.82	-0.86	-0.73	FALSE	1.05	-0.42	-0.06	-0.07	0.08	TCGA-EB-A5SH	Immune anergy	0.173543
TCGA-EB-A5UL	SKCM	FALSE	TRUE	-0.29	1.13	0.62	0.68	-0.09	1.09	TRUE	-0.29	-1.16	0.03	-0.18	-0.04	TCGA-EB-A5UL	Immune anergy	0.425998
TCGA-EB-A5UM	SKCM	FALSE	FALSE	0.85	0.37	0.37	0.34	-0.35	0.79	TRUE	0.85	-0.59	0	-0.15	0.05	TCGA-EB-A5UM	Immune anergy	0.235292
TCGA-EB-A5UN	SKCM	FALSE	FALSE	0.33	-0.96	0.65	-0.7	0.93	-0.84	FALSE	-1.16	0.33	-0.01	0.1	-0.03	TCGA-EB-A5UN	Immune anergy	0.479895
TCGA-EB-A5VU	SKCM	TRUE	FALSE	1.1	-1.07	0.38	-1.2	-0.81	-1.36	FALSE	-1.26	1.1	0.07	0.03	0.06	TCGA-EB-A5VU	Immune anergy	0.132323
TCGA-EB-A5VV	SKCM	FALSE	FALSE	2.1	1.88	0.69	1.72	1.18	2.35	TRUE	2.1	-3.3	-0.26	-0.23	-0.02	TCGA-EB-A5VV	Immune stimulation	0.898817
TCGA-EB-A6L9	SKCM	FALSE	FALSE	2.51	0.7	0.22	0.93	0.05	1.5	TRUE	2.51	-1.64	-0.13	-0.09	-0.03	TCGA-EB-A6L9	Immune stimulation	0.687563
TCGA-EB-A6QY	SKCM	FALSE	TRUE	-0.17	-1.13	0.68	-1.01	-0.54	-1.28	FALSE	-1.01	-0.17	0.02	-0.08	0.02	TCGA-EB-A6QY	Immune anergy	0.289884
TCGA-EB-A6QZ	SKCM	TRUE	FALSE	1.35	-1.76	0.39	-1.34	-0.93	-1.68	FALSE	-0.53	1.35	0.13	0.03	0.05	TCGA-EB-A6QZ	Immune anergy	0.0911689
TCGA-EB-A6R0	SKCM	FALSE	TRUE	-0.63	2.7	0.79	1.48	2.16	1.4	TRUE	-0.63	-1.1	0.07	-0.14	-0.12	TCGA-EB-A6R0	Immune stimulation	0.252825
TCGA-EB-A82B	SKCM	FALSE	FALSE	0.19	0.53	0.5	0.55	0.37	0.43	TRUE	0.19	-0.6	0.01	-0.03	-0.08	TCGA-EB-A82B	Immune anergy	0.328243
TCGA-EB-A82C	SKCM	TRUE	FALSE	1.59	-1.3	0.34	-1.28	-0.91	-1.75	FALSE	-1.28	1.59	0.13	0.04	0.07	TCGA-EB-A82C	Immune anergy	0.0871021
TCGA-EB-A85I	SKCM	FALSE	FALSE	1.03	0.9	0.7	0.83	0.32	1.51	TRUE	1.03	0.15	0.04	0.03	-0.06	TCGA-EB-A85I	Immune anergy	0.409644
TCGA-EB-A85J	SKCM	FALSE	FALSE	0.62	1.67	0.62	1.46	0.57	2.11	TRUE	0.62	-2.04	-0.09	-0.2	-0.04	TCGA-EB-A85J	Immune anergy	0.380686
TCGA-EB-A97M	SKCM	FALSE	TRUE	-0.36	-0.02	0.48	0.22	-0.18	-0.31	FALSE	0.85	-0.36	-0.02	-0.03	0.01	TCGA-EB-A97M	Immune anergy	0.120848
TCGA-EE-A17X	SKCM	FALSE	TRUE	-0.34	-1.86	0.47	-1.21	-0.65	-1.31	FALSE	0.3	-0.34	0.02	-0.08	0.02	TCGA-EE-A17X	Immune anergy	0.113273
TCGA-EE-A17Y	SKCM	TRUE	FALSE	3.02	-1.81	0.29	-1.51	-1.05	-1.59	FALSE	-0.93	3.02	0.25	0.18	0.03	TCGA-EE-A17Y	Immune anergy	0.33946
TCGA-EE-A17Z	SKCM	TRUE	FALSE	1.24	-2.55	0.15	-1.9	-1.07	-1.76	FALSE	-0.96	1.24	0.09	-0.02	0.12	TCGA-EE-A17Z	Immune exclusion	0.0654493
TCGA-EE-A180	SKCM	FALSE	FALSE	0.6	-0.49	0.34	-0.72	-0.1	-1.07	FALSE	-0.89	0.6	0.07	0.03	0	TCGA-EE-A180	Immune exclusion	0.0529721
TCGA-EE-A181	SKCM	FALSE	TRUE	-0.03	2.12	0.69	1.45	0.86	1.71	TRUE	-0.03	-2.09	-0.09	-0.14	-0.11	TCGA-EE-A181	Immune stimulation	0.348791
TCGA-EE-A182	SKCM	FALSE	TRUE	-0.15	-1.89	0.11	-0.58	-0.9	-0.92	FALSE	2	-0.15	-0.05	0.02	0.03	TCGA-EE-A182	Immune anergy	0.309578
TCGA-EE-A184	SKCM	FALSE	TRUE	-0.1	0	0.32	0.22	0.02	0.48	TRUE	-0.1	-0.75	-0.02	-0.1	0.01	TCGA-EE-A184	Immune anergy	0.166648
TCGA-EE-A185	SKCM	FALSE	FALSE	0.49	-2.66	0.45	-1.99	-1.05	-1.9	FALSE	-0.74	0.49	0.08	-0.07	0.06	TCGA-EE-A185	Immune exclusion	0.0669192
TCGA-EE-A20B	SKCM	FALSE	FALSE	0.32	0.31	0.21	0.24	-0.53	0.57	TRUE	0.32	1.8	0.06	0.19	0.03	TCGA-EE-A20B	Immune anergy	0.257309
TCGA-EE-A20F	SKCM	FALSE	TRUE	-0.66	0.81	0.7	0.64	-0.06	0.59	TRUE	-0.66	-0.49	0.02	-0.06	-0.04	TCGA-EE-A20F	Immune anergy	0.317466
TCGA-EE-A20H	SKCM	FALSE	FALSE	1.84	-0.86	0.53	-1.05	-0.96	-1.25	FALSE	-1.1	1.84	0.19	0	0.07	TCGA-EE-A20H	Immune exclusion	0.0626443
TCGA-EE-A20I	SKCM	FALSE	FALSE	0.25	0.12	0.74	-0.05	0.15	-0.17	FALSE	0.02	0.25	0	0.07	-0.03	TCGA-EE-A20I	Immune anergy	0.237966
TCGA-EE-A29A	SKCM	TRUE	FALSE	2.32	-1.74	0.43	-1.38	-0.38	-1.72	FALSE	-0.46	2.32	0.14	0.17	0.05	TCGA-EE-A29A	Immune exclusion	0.0658564
TCGA-EE-A29B	SKCM	FALSE	TRUE	-0.11	-1.33	0.35	-0.71	-0.56	-1.33	FALSE	-0.37	-0.11	0.03	-0.14	0.09	TCGA-EE-A29B	Immune exclusion	0.0491101
TCGA-EE-A29C	SKCM	TRUE	FALSE	1.42	-1.39	0.24	-0.85	-0.67	-1.36	FALSE	0.36	1.42	0.03	0.15	0.04	TCGA-EE-A29C	Immune anergy	0.30679
TCGA-EE-A29D	SKCM	TRUE	FALSE	1.14	-1.78	0.37	-1.35	-0.59	-1.7	FALSE	-1.16	1.14	0.07	0.05	0.05	TCGA-EE-A29D	Immune exclusion	0.0671469
TCGA-EE-A29E	SKCM	TRUE	FALSE	1.15	-1.16	0.54	-1.36	-1.16	-1.84	FALSE	-1.43	1.15	0.12	0.03	0.02	TCGA-EE-A29E	Immune anergy	0.171342
TCGA-EE-A29G	SKCM	FALSE	TRUE	-0.33	-0.14	0.87	-0.23	-0.45	-0.69	FALSE	0.45	-0.33	-0.09	0.01	0.03	TCGA-EE-A29G	Immune anergy	0.235888
TCGA-EE-A29H	SKCM	FALSE	TRUE	-0.14	-0.19	0.52	-0.23	-0.24	-0.41	FALSE	-0.33	-0.14	0.03	-0.07	0.01	TCGA-EE-A29H	Immune anergy	0.199932
TCGA-EE-A29L	SKCM	FALSE	TRUE	-0.02	-2.23	0.69	-1.86	-0.95	-1.85	FALSE	-1.97	-0.02	0.09	-0.15	0.05	TCGA-EE-A29L	Immune exclusion	0.0536476
TCGA-EE-A29M	SKCM	FALSE	TRUE	-0.87	1.1	0.77	0.69	0.73	0.94	TRUE	-0.87	-1.08	-0.03	-0.14	-0.01	TCGA-EE-A29M	Immune anergy	0.436416
TCGA-EE-A29N	SKCM	FALSE	FALSE	0.35	0.85	0.77	0.71	0.85	0.56	TRUE	0.35	-0.9	-0.03	-0.06	-0.04	TCGA-EE-A29N	Immune anergy	0.497847
TCGA-EE-A29P	SKCM	FALSE	FALSE	0.82	3.5	0.58	2.25	0.86	2.87	TRUE	0.82	-2.43	-0.17	-0.09	-0.12	TCGA-EE-A29P	Immune stimulation	0.364801
TCGA-EE-A29Q	SKCM	TRUE	FALSE	1.23	-1.76	0.91	-1.32	-0.19	-1.6	FALSE	-1.62	1.23	0.12	0.01	0.06	TCGA-EE-A29Q	Immune anergy	0.146468
TCGA-EE-A29R	SKCM	TRUE	FALSE	2.6	-1.3	0.4	-1.11	-0.86	-1.31	FALSE	-1.41	2.6	0.18	0.19	0.03	TCGA-EE-A29R	Immune exclusion	0.0625754
TCGA-EE-A29S	SKCM	FALSE	FALSE	0.95	0.02	0.59	0.34	-0.54	0.28	FALSE	-0.74	0.95	0.01	0.09	0.04	TCGA-EE-A29S	Immune anergy	0.277171
TCGA-EE-A29T	SKCM	FALSE	FALSE	0.18	0.66	0.34	0.8	0.68	0.87	TRUE	0.18	-0.57	-0.06	0	-0.03	TCGA-EE-A29T	Immune anergy	0.397431
TCGA-EE-A29V	SKCM	TRUE	FALSE	1.05	-2.12	0.26	-1.38	-0.73	-1.75	FALSE	0.27	1.05	0.08	0.04	0.05	TCGA-EE-A29V	Immune anergy	0.277988
TCGA-EE-A29X	SKCM	FALSE	TRUE	-0.51	-0.05	0.22	0.48	0.54	-0.02	FALSE	1.75	-0.51	-0.05	0.02	-0.04	TCGA-EE-A29X	Immune anergy	0.297033
TCGA-EE-A2A0	SKCM	FALSE	FALSE	0.14	1.27	0.54	0.68	0.43	0.79	FALSE	-0.43	0.14	-0.13	0.15	0.01	TCGA-EE-A2A0	Immune anergy	0.455618
TCGA-EE-A2A1	SKCM	FALSE	FALSE	1.9	1.54	0.19	1.41	0.89	1.14	TRUE	1.9	-0.64	-0.18	0.11	-0.02	TCGA-EE-A2A1	Immune stimulation	0.537021
TCGA-EE-A2A2	SKCM	FALSE	TRUE	-0.25	0.21	0.46	-0.28	-0.18	-0.24	FALSE	-1.23	-0.25	0.09	-0.16	0.01	TCGA-EE-A2A2	Immune anergy	0.203353
TCGA-EE-A2A5	SKCM	TRUE	FALSE	1.97	-1.38	0.3	-1.16	-0.67	-1.43	FALSE	-1.34	1.97	0.09	0.1	0.12	TCGA-EE-A2A5	Immune anergy	0.116566
TCGA-EE-A2A6	SKCM	FALSE	FALSE	0	1.05	0.54	0.83	0.07	1.76	TRUE	0	-0.97	-0.02	-0.09	-0.06	TCGA-EE-A2A6	Immune anergy	0.386222
TCGA-EE-A2GB	SKCM	FALSE	FALSE	0.14	-0.04	0.83	-0.54	-0.41	-0.89	FALSE	-1	0.14	0.01	-0.02	0.03	TCGA-EE-A2GB	Immune anergy	0.123411
TCGA-EE-A2GC	SKCM	FALSE	TRUE	-0.48	2.57	0.77	1.53	0.54	1.76	TRUE	-0.48	-1.42	-0.12	-0.01	-0.09	TCGA-EE-A2GC	Immune stimulation	0.263637
TCGA-EE-A2GD	SKCM	FALSE	FALSE	0.8	-0.58	0.34	-0.39	-0.05	-1.36	FALSE	-0.01	0.8	-0.11	0.28	-0.04	TCGA-EE-A2GD	Immune anergy	0.424687
TCGA-EE-A2GE	SKCM	FALSE	FALSE	1.55	2.15	0.27	1.9	0.97	2.49	TRUE	1.55	0.07	-0.08	0.16	-0.07	TCGA-EE-A2GE	Immune stimulation	0.511505
TCGA-EE-A2GH	SKCM	FALSE	FALSE	1.04	2.26	0.54	1.82	0.63	2.6	TRUE	1.04	-0.71	-0.1	0.04	-0.05	TCGA-EE-A2GH	Immune stimulation	0.553862
TCGA-EE-A2GI	SKCM	FALSE	TRUE	-0.04	1.59	0.7	1.18	0.27	1.7	TRUE	-0.04	-0.37	0.08	-0.1	-0.05	TCGA-EE-A2GI	Immune anergy	0.336273
TCGA-EE-A2GJ	SKCM	FALSE	TRUE	-0.83	1.34	0.37	0.99	0.43	1.08	FALSE	-0.44	-0.83	-0.06	-0.04	-0.03	TCGA-EE-A2GJ	Immune anergy	0.320464
TCGA-EE-A2GK	SKCM	FALSE	FALSE	2.47	1.1	0.44	1.35	0.32	2.1	TRUE	2.47	-3	-0.24	-0.21	-0.01	TCGA-EE-A2GK	Immune stimulation	0.901376
TCGA-EE-A2GL	SKCM	FALSE	FALSE	0.91	0.53	0.63	0.78	0.28	1.33	TRUE	0.91	-1.28	-0.13	-0.12	0.04	TCGA-EE-A2GL	Immune stimulation	0.580187
TCGA-EE-A2GM	SKCM	FALSE	FALSE	0.42	-0.8	0.31	-0.82	-0.53	-0.51	FALSE	-1.43	0.42	0.02	-0.04	0.09	TCGA-EE-A2GM	Immune anergy	0.109826
TCGA-EE-A2GN	SKCM	FALSE	FALSE	1.37	-0.67	0.24	-0.71	-0.77	-1.15	FALSE	-0.49	1.37	0.02	0.12	0.08	TCGA-EE-A2GN	Immune anergy	0.123267
TCGA-EE-A2GO	SKCM	TRUE	FALSE	1.96	-2	0.34	-1.59	-0.58	-1.69	FALSE	-0.17	1.96	0.17	0.11	0.03	TCGA-EE-A2GO	Immune exclusion	0.0451041
TCGA-EE-A2GP	SKCM	FALSE	FALSE	1.27	-0.08	0.41	-0.21	0.08	-1.05	FALSE	-0.68	1.27	0.01	0.14	0.04	TCGA-EE-A2GP	Immune anergy	0.26172
TCGA-EE-A2GR	SKCM	FALSE	FALSE	0.73	-1.86	0.61	-1.62	-1.16	-1.83	FALSE	-1.92	0.73	0.06	0	0.05	TCGA-EE-A2GR	Immune exclusion	0.0216083
TCGA-EE-A2GS	SKCM	FALSE	FALSE	1	0.86	0.26	-0.03	-0.25	-0.43	FALSE	-0.68	1	0.11	0.03	0.01	TCGA-EE-A2GS	Immune anergy	0.0987664
TCGA-EE-A2GT	SKCM	FALSE	TRUE	-1.55	-0.51	0.15	0.27	-0.55	0.32	FALSE	1.97	-1.55	-0.15	-0.12	0.04	TCGA-EE-A2GT	Immune anergy	0.518535
TCGA-EE-A2GU	SKCM	FALSE	TRUE	-0.66	1.77	0.62	1.49	0.68	2.26	TRUE	-0.66	-1.68	-0.04	-0.2	-0.03	TCGA-EE-A2GU	Immune stimulation	0.345931
TCGA-EE-A2M5	SKCM	FALSE	FALSE	0.05	0.25	0.62	0.42	3.41	0.8	TRUE	0.05	1.03	0.18	0	-0.03	TCGA-EE-A2M5	Immune anergy	0.396041
TCGA-EE-A2M6	SKCM	FALSE	FALSE	0.31	-0.3	0.27	-0.37	-0.4	-0.71	FALSE	-0.89	0.31	0.11	-0.11	0.03	TCGA-EE-A2M6	Immune anergy	0.0887546
TCGA-EE-A2M7	SKCM	FALSE	FALSE	0.94	-0.8	0.21	-0.37	-0.63	-0.08	FALSE	0.18	0.94	0.01	0.1	0.04	TCGA-EE-A2M7	Immune anergy	0.364409
TCGA-EE-A2M8	SKCM	FALSE	FALSE	2.13	3.32	0.61	2.75	1.61	3.83	TRUE	2.13	-3.15	-0.33	-0.04	-0.12	TCGA-EE-A2M8	Immune stimulation	0.620439
TCGA-EE-A2MC	SKCM	FALSE	FALSE	1.34	2.2	0.64	1.83	1.43	2.26	TRUE	1.34	0.11	0.03	0.08	-0.1	TCGA-EE-A2MC	Immune stimulation	0.547068
TCGA-EE-A2MD	SKCM	FALSE	TRUE	-0.63	-0.15	0.46	-0.3	-0.42	-0.49	FALSE	-1.13	-0.63	-0.01	-0.12	0.03	TCGA-EE-A2MD	Immune anergy	0.348259
TCGA-EE-A2ME	SKCM	FALSE	FALSE	1.9	3.09	0.65	2.41	1.52	3.42	TRUE	1.9	-2.59	-0.28	-0.04	-0.08	TCGA-EE-A2ME	Immune stimulation	0.796452
TCGA-EE-A2MF	SKCM	FALSE	TRUE	-0.67	0.21	0.68	0.06	-0.29	-0.09	FALSE	-1.51	-0.67	-0.02	-0.09	0	TCGA-EE-A2MF	Immune anergy	0.112533
TCGA-EE-A2MG	SKCM	FALSE	FALSE	1.49	1.12	0.33	1.1	0.41	1.62	TRUE	1.49	-0.94	-0.16	0.03	-0.02	TCGA-EE-A2MG	Immune stimulation	0.600483
TCGA-EE-A2MH	SKCM	FALSE	FALSE	0.31	0.62	0.44	0.69	-0.42	0.94	TRUE	0.31	-1.25	-0.07	-0.11	-0.02	TCGA-EE-A2MH	Immune anergy	0.498646
TCGA-EE-A2MI	SKCM	FALSE	FALSE	0.15	1.42	0.58	0.97	0.54	0.58	FALSE	0.19	0.15	-0.05	0.13	-0.05	TCGA-EE-A2MI	Immune stimulation	0.327936
TCGA-EE-A2MJ	SKCM	FALSE	FALSE	0.64	2.31	0.66	1.72	0.96	2.52	TRUE	0.64	-2.69	-0.17	-0.17	-0.08	TCGA-EE-A2MJ	Immune stimulation	0.526349
TCGA-EE-A2MK	SKCM	FALSE	TRUE	-0.6	2.18	0.51	1.41	1.13	1.46	FALSE	0.12	-0.6	-0.08	0.07	-0.08	TCGA-EE-A2MK	Immune stimulation	0.205125
TCGA-EE-A2ML	SKCM	FALSE	TRUE	-1	0.57	0.73	0.77	0.83	1.09	FALSE	-0.22	-1	-0.07	-0.02	-0.06	TCGA-EE-A2ML	Immune anergy	0.338033
TCGA-EE-A2MM	SKCM	FALSE	FALSE	0.23	0.08	0.52	-0.41	-0.27	-1.07	FALSE	-0.84	0.23	0.11	-0.06	-0.02	TCGA-EE-A2MM	Immune exclusion	0.0722378
TCGA-EE-A2MN	SKCM	FALSE	TRUE	-0.14	1.33	0.39	1.07	0.12	1.3	TRUE	-0.14	-2.14	-0.15	-0.11	-0.06	TCGA-EE-A2MN	Immune stimulation	0.231118
TCGA-EE-A2MP	SKCM	FALSE	FALSE	0.16	0.98	0.53	1.06	0.18	1.24	TRUE	0.16	-0.5	0	-0.06	-0.02	TCGA-EE-A2MP	Immune anergy	0.255981
TCGA-EE-A2MQ	SKCM	FALSE	FALSE	0.68	-0.36	0.38	-0.61	0.26	-0.72	FALSE	-1.02	0.68	0.05	0.06	0.01	TCGA-EE-A2MQ	Immune anergy	0.167823
TCGA-EE-A2MR	SKCM	FALSE	TRUE	-0.6	1.58	0.27	1.59	2.46	2.18	FALSE	1.44	-0.6	-0.09	0.03	-0.02	TCGA-EE-A2MR	Immune stimulation	0.626262
TCGA-EE-A2MS	SKCM	FALSE	FALSE	0.2	-0.02	0.15	0.17	-0.43	0.28	FALSE	-0.3	0.2	0.04	-0.02	0.01	TCGA-EE-A2MS	Immune anergy	0.149638
TCGA-EE-A2MT	SKCM	FALSE	FALSE	1.17	-0.6	0.69	-0.62	-0.52	-0.88	FALSE	-1.18	1.17	0.16	-0.01	0.01	TCGA-EE-A2MT	Immune anergy	0.131239
TCGA-EE-A2MU	SKCM	FALSE	FALSE	1.5	2.31	0.5	1.7	1.35	1.56	TRUE	1.5	-1.06	-0.11	0.03	-0.08	TCGA-EE-A2MU	Immune stimulation	0.517278
TCGA-EE-A3AA	SKCM	FALSE	TRUE	-0.98	0.97	0.59	0.68	-0.01	0.59	FALSE	-0.07	-0.98	-0.04	-0.06	-0.06	TCGA-EE-A3AA	Immune anergy	0.592487
TCGA-EE-A3AB	SKCM	FALSE	FALSE	0.68	-0.69	0.12	-0.3	-0.77	-0.61	FALSE	0.34	0.68	0.04	0.1	-0.02	TCGA-EE-A3AB	Immune anergy	0.330763
TCGA-EE-A3AC	SKCM	FALSE	TRUE	-0.73	1.12	0.42	0.51	0.34	0.86	TRUE	-0.73	-1.01	0.02	-0.14	-0.05	TCGA-EE-A3AC	Immune anergy	0.206083
TCGA-EE-A3AD	SKCM	FALSE	FALSE	0.69	-2.02	0.6	-1.61	-0.77	-1.74	FALSE	-1.73	0.69	0.05	0.04	0.02	TCGA-EE-A3AD	Immune exclusion	0.0384324
TCGA-EE-A3AF	SKCM	FALSE	TRUE	-0.3	0.18	0.64	0.15	-0.31	0.25	FALSE	0.12	-0.3	-0.04	-0.02	0.01	TCGA-EE-A3AF	Immune anergy	0.236679
TCGA-EE-A3AG	SKCM	TRUE	FALSE	2.67	-1.73	0.49	-1.65	-1.09	0.06	FALSE	-0.96	2.67	0.3	0.04	0.07	TCGA-EE-A3AG	Immune anergy	0.087679
TCGA-EE-A3AH	SKCM	TRUE	FALSE	1.63	-1.64	0.32	-1.57	-0.73	-1.68	FALSE	-1.03	1.63	0.09	0.12	0.05	TCGA-EE-A3AH	Immune exclusion	0.0374084
TCGA-EE-A3J3	SKCM	FALSE	FALSE	1.29	0.33	0.45	0.09	-0.58	-0.44	FALSE	-0.56	1.29	0.08	0.14	-0.02	TCGA-EE-A3J3	Immune anergy	0.201569
TCGA-EE-A3J4	SKCM	FALSE	FALSE	0.26	0.72	0.87	-0.37	-0.01	-0.86	FALSE	-1.21	0.26	0.05	-0.02	0.01	TCGA-EE-A3J4	Immune anergy	0.0984263
TCGA-EE-A3J5	SKCM	FALSE	FALSE	0.05	1.71	0.53	1.03	0.29	1.03	TRUE	0.05	-0.49	-0.05	0.02	-0.04	TCGA-EE-A3J5	Immune anergy	0.290064
TCGA-EE-A3J7	SKCM	FALSE	FALSE	0.62	-0.48	0.61	-0.48	-0.61	-0.14	FALSE	-1.55	0.62	0.1	-0.06	0.05	TCGA-EE-A3J7	Immune anergy	0.0925267
TCGA-EE-A3J8	SKCM	FALSE	FALSE	0.98	-1.89	0.45	-1.93	-0.98	-1.76	FALSE	-1.86	0.98	0.12	-0.03	0.06	TCGA-EE-A3J8	Immune exclusion	0.0279078
TCGA-EE-A3JA	SKCM	FALSE	TRUE	-0.75	1.01	0.82	0.27	0.02	0.88	FALSE	-1.42	-0.75	-0.08	-0.04	0.01	TCGA-EE-A3JA	Immune anergy	0.209226
TCGA-EE-A3JB	SKCM	FALSE	FALSE	2.15	0.41	0.28	-0.06	0.02	-1	FALSE	-0.24	2.15	0.2	0.13	0	TCGA-EE-A3JB	Immune anergy	0.31131
TCGA-EE-A3JD	SKCM	FALSE	FALSE	0.67	2.62	0.8	1.83	1.27	1.98	TRUE	0.67	-1.69	-0.09	-0.1	-0.07	TCGA-EE-A3JD	Immune stimulation	0.719766
TCGA-EE-A3JE	SKCM	FALSE	FALSE	1.12	3.32	0.73	2.58	2.48	3.44	TRUE	1.12	-1.26	-0.18	0.09	-0.1	TCGA-EE-A3JE	Immune stimulation	0.603898
TCGA-EE-A3JH	SKCM	FALSE	FALSE	2.57	2.26	0.38	2.27	1.62	2.85	TRUE	2.57	-2.86	-0.28	-0.06	-0.09	TCGA-EE-A3JH	Immune stimulation	0.593764
TCGA-EE-A3JI	SKCM	FALSE	TRUE	-0.71	-0.53	0.8	-0.76	-0.36	-1.04	FALSE	-1.39	-0.71	0.01	-0.13	0	TCGA-EE-A3JI	Immune exclusion	0.0854908
TCGA-ER-A193	SKCM	FALSE	FALSE	1.01	2.52	0.55	1.49	1.78	1.49	TRUE	1.01	-0.27	-0.11	0.15	-0.08	TCGA-ER-A193	Immune anergy	0.341873
TCGA-ER-A194	SKCM	FALSE	TRUE	-1.02	-0.76	0.09	0.24	-0.7	0.29	FALSE	1.91	-1.02	-0.1	-0.06	0.02	TCGA-ER-A194	Immune anergy	0.316114
TCGA-ER-A195	SKCM	FALSE	FALSE	1.18	1.47	0.34	1.41	0.51	1.54	TRUE	1.18	0.18	-0.08	0.13	-0.01	TCGA-ER-A195	Immune stimulation	0.341844
TCGA-ER-A196	SKCM	FALSE	FALSE	0.45	-1.5	0.51	-1.11	-0.09	-1.88	FALSE	0	0.45	0.01	0.07	-0.01	TCGA-ER-A196	Immune anergy	0.555601
TCGA-ER-A197	SKCM	FALSE	FALSE	0.99	1.37	0.41	1.32	-0.04	1.75	TRUE	0.99	-1.33	-0.1	-0.01	-0.09	TCGA-ER-A197	Immune stimulation	0.519843
TCGA-ER-A198	SKCM	FALSE	TRUE	-1.13	0.48	0.85	0.21	0.14	-0.87	FALSE	-0.92	-1.13	-0.03	-0.14	-0.02	TCGA-ER-A198	Immune anergy	0.213871
TCGA-ER-A199	SKCM	FALSE	FALSE	1.07	0.98	0.23	1.21	0.43	1.95	TRUE	1.07	-2.01	-0.14	-0.14	-0.03	TCGA-ER-A199	Immune stimulation	0.564375
TCGA-ER-A19A	SKCM	FALSE	FALSE	1.94	2.9	0.58	2.3	1.69	2.16	TRUE	1.94	-1.39	-0.23	0.14	-0.12	TCGA-ER-A19A	Immune stimulation	0.620106
TCGA-ER-A19B	SKCM	TRUE	FALSE	1.55	-1.6	0.42	-1.2	-0.18	-0.73	FALSE	-0.58	1.55	0.1	0.11	0.03	TCGA-ER-A19B	Immune anergy	0.129608
TCGA-ER-A19C	SKCM	FALSE	FALSE	0.54	-1.56	0.54	-1.13	-0.73	-1.55	FALSE	-1	0.54	-0.01	0.09	0.02	TCGA-ER-A19C	Immune anergy	0.163843
TCGA-ER-A19D	SKCM	FALSE	FALSE	1.5	0.73	0.1	0.45	-0.43	0.26	FALSE	0.33	1.5	0.01	0.18	0.04	TCGA-ER-A19D	Immune anergy	0.19678
TCGA-ER-A19E	SKCM	FALSE	FALSE	1.77	-0.57	0.14	-0.74	-0.81	-1.07	FALSE	-0.97	1.77	0.15	0.06	0.06	TCGA-ER-A19E	Immune anergy	0.18701
TCGA-ER-A19F	SKCM	FALSE	FALSE	1.01	-0.3	0.63	-0.51	-0.78	-0.87	FALSE	-1.56	1.01	0.12	-0.01	0.04	TCGA-ER-A19F	Immune anergy	0.134172
TCGA-ER-A19G	SKCM	FALSE	TRUE	-1.55	1.93	0.72	1.13	2.16	0.13	FALSE	-0.36	-1.55	-0.04	-0.09	-0.12	TCGA-ER-A19G	Immune anergy	0.242012
TCGA-ER-A19H	SKCM	FALSE	TRUE	-0.26	1.03	0.38	0.61	-0.09	1.14	TRUE	-0.26	0.76	0.04	0.05	0.03	TCGA-ER-A19H	Immune anergy	0.249428
TCGA-ER-A19J	SKCM	TRUE	FALSE	1.28	-1.12	0.31	-0.78	-0.19	-0.68	FALSE	-1.06	1.28	-0.01	0.16	0.05	TCGA-ER-A19J	Immune anergy	0.0943338
TCGA-ER-A19K	SKCM	FALSE	TRUE	-0.16	0.06	0.8	-0.28	0.13	-0.73	FALSE	-0.54	-0.16	-0.01	-0.04	0.02	TCGA-ER-A19K	Immune anergy	0.363714
TCGA-ER-A19L	SKCM	FALSE	FALSE	0.9	-1.23	0.36	-1.13	-0.69	-1.61	FALSE	-0.49	0.9	-0.02	0.14	0.03	TCGA-ER-A19L	Immune exclusion	0.0815645
TCGA-ER-A19M	SKCM	FALSE	TRUE	-0.42	2.96	0.61	1.89	3.46	1.84	TRUE	-0.42	0.08	0.02	0.05	-0.06	TCGA-ER-A19M	Immune stimulation	0.365909
TCGA-ER-A19N	SKCM	FALSE	FALSE	1.51	1.2	0.49	1.36	0.5	1.59	TRUE	1.51	-1.53	-0.21	0.04	-0.06	TCGA-ER-A19N	Immune stimulation	0.539467
TCGA-ER-A19P	SKCM	FALSE	FALSE	2.22	2.92	0.51	2.45	1.28	3.61	TRUE	2.22	-3.09	-0.26	-0.13	-0.08	TCGA-ER-A19P	Immune stimulation	0.638995
TCGA-ER-A19Q	SKCM	FALSE	FALSE	0.8	1.25	0.25	0.87	0.7	0.51	TRUE	0.8	-1.18	-0.14	0.04	-0.07	TCGA-ER-A19Q	Immune anergy	0.348563
TCGA-ER-A19S	SKCM	FALSE	FALSE	1.41	3.85	0.71	2.86	1.68	3.86	TRUE	1.41	-3.36	-0.2	-0.16	-0.16	TCGA-ER-A19S	Immune stimulation	0.58435
TCGA-ER-A19T	SKCM	TRUE	FALSE	1.37	-2.49	0.31	-1.83	-1.12	-1.74	FALSE	-0.71	1.37	0.09	0.06	0.06	TCGA-ER-A19T	Immune anergy	0.154073
TCGA-ER-A19W	SKCM	FALSE	FALSE	0.67	3.53	0.76	2.41	1.97	3.1	TRUE	0.67	-2.88	-0.2	-0.14	-0.1	TCGA-ER-A19W	Immune stimulation	0.567282
TCGA-ER-A1A1	SKCM	FALSE	FALSE	2.09	0.88	0.61	1.24	0.69	0.91	TRUE	2.09	-3.11	-0.24	-0.24	0	TCGA-ER-A1A1	Immune stimulation	0.872862
TCGA-ER-A2NB	SKCM	TRUE	FALSE	1.73	-1.07	0.37	-0.04	-0.72	0.3	TRUE	1.73	-1.05	-0.08	-0.06	-0.01	TCGA-ER-A2NB	Immune anergy	0.368749
TCGA-ER-A2NC	SKCM	FALSE	FALSE	1.84	-0.43	0.14	-0.05	1.18	-0.55	FALSE	0.65	1.84	0.03	0.22	0.03	TCGA-ER-A2NC	Immune anergy	0.285115
TCGA-ER-A2ND	SKCM	FALSE	TRUE	-0.08	-0.49	0.35	-0.45	-0.66	-0.78	FALSE	-0.58	-0.08	0.03	-0.05	0.01	TCGA-ER-A2ND	Immune anergy	0.192014
TCGA-ER-A2NF	SKCM	FALSE	TRUE	-0.65	0.31	0.55	0.67	0.25	0.87	FALSE	0.27	-0.65	-0.12	0.01	0.02	TCGA-ER-A2NF	Immune anergy	0.181023
TCGA-ER-A2NG	SKCM	FALSE	FALSE	1.03	2.63	0.74	2.07	1.54	2.51	TRUE	1.03	-2.04	-0.12	-0.06	-0.14	TCGA-ER-A2NG	Immune stimulation	0.479342
TCGA-ER-A2NH	SKCM	FALSE	FALSE	1.53	2.99	0.51	2.54	1.58	3.57	TRUE	1.53	-1.37	-0.11	0.01	-0.1	TCGA-ER-A2NH	Immune stimulation	0.477975
TCGA-ER-A3ES	SKCM	FALSE	TRUE	-0.35	-2.78	0.8	-2.1	-0.62	-1.78	FALSE	-1.64	-0.35	-0.01	-0.12	0.09	TCGA-ER-A3ES	Immune exclusion	0.0145865
TCGA-ER-A3ET	SKCM	FALSE	FALSE	0.36	0.01	0.68	-0.21	0.38	-1.07	FALSE	-0.02	0.36	-0.07	0.16	-0.04	TCGA-ER-A3ET	Immune anergy	0.296949
TCGA-ER-A3EV	SKCM	FALSE	FALSE	0.09	-0.52	0.23	-0.08	-0.63	0.63	FALSE	0.05	0.09	0.02	-0.05	0.04	TCGA-ER-A3EV	Immune anergy	0.205957
TCGA-ER-A3PL	SKCM	FALSE	FALSE	1.1	-0.41	0.43	-0.76	-0.11	-0.87	FALSE	-1.16	1.1	0.02	0.16	-0.01	TCGA-ER-A3PL	Immune exclusion	0.0726333
TCGA-ER-A42H	SKCM	TRUE	FALSE	1.29	-1.63	0.35	-1.38	-0.86	-1.73	FALSE	-1.45	1.29	0.06	0.04	0.1	TCGA-ER-A42H	Immune exclusion	0.0245368
TCGA-ER-A42K	SKCM	TRUE	FALSE	1.97	-1.17	0.33	-1.11	-0.76	-1.58	FALSE	-1.07	1.97	0.16	0.13	0.01	TCGA-ER-A42K	Immune anergy	0.12364
TCGA-ER-A42L	SKCM	FALSE	FALSE	0.98	1.41	0.78	1.45	0.76	2.2	TRUE	0.98	-1.3	-0.19	0.01	-0.02	TCGA-ER-A42L	Immune stimulation	0.415828
TCGA-FR-A2OS	SKCM	TRUE	FALSE	1.39	-1.67	0.56	-1.31	-0.94	-1.88	FALSE	-1.8	1.39	0.08	0.06	0.07	TCGA-FR-A2OS	Immune anergy	0.155661
TCGA-FR-A3R1	SKCM	FALSE	TRUE	-1.26	1.7	0.83	0.79	1.69	0.28	TRUE	-1.26	-0.38	0.03	-0.06	-0.04	TCGA-FR-A3R1	Immune anergy	0.246184
TCGA-FR-A3YN	SKCM	FALSE	TRUE	-1.16	0.93	0.48	0.44	0.67	1.01	FALSE	-0.48	-1.16	-0.1	-0.05	-0.03	TCGA-FR-A3YN	Immune anergy	0.17183
TCGA-FR-A44A	SKCM	FALSE	FALSE	1.11	3.55	0.63	2.52	1.91	2.82	TRUE	1.11	-2.85	-0.21	-0.06	-0.16	TCGA-FR-A44A	Immune stimulation	0.541661
TCGA-FR-A69P	SKCM	TRUE	FALSE	1.9	-1.14	0.25	-1.08	-0.89	-1.21	FALSE	-1.49	1.9	0.11	0.12	0.07	TCGA-FR-A69P	Immune anergy	0.120101
TCGA-FR-A726	SKCM	TRUE	FALSE	1.33	-1.55	0.47	-1.33	-0.78	-1.66	FALSE	-1.06	1.33	0.13	0.04	0.04	TCGA-FR-A726	Immune anergy	0.342127
TCGA-FR-A728	SKCM	FALSE	FALSE	1.13	1.32	0.64	0.97	0.47	1.31	TRUE	1.13	-0.46	-0.01	0	-0.07	TCGA-FR-A728	Immune anergy	0.51796
TCGA-FR-A729	SKCM	FALSE	FALSE	0.79	2.13	0.46	1.58	0.73	2.26	TRUE	0.79	-1.37	-0.06	-0.1	-0.05	TCGA-FR-A729	Immune stimulation	0.376776
TCGA-FR-A7U8	SKCM	FALSE	FALSE	0.95	-1.41	0.74	-1.36	-0.94	-1.68	FALSE	-1.09	0.95	0.14	-0.08	0.07	TCGA-FR-A7U8	Immune anergy	0.0973611
TCGA-FR-A7U9	SKCM	FALSE	FALSE	0.82	0.91	0.78	0.89	1.47	-0.01	FALSE	0.88	0.82	0.03	0.13	-0.03	TCGA-FR-A7U9	Immune anergy	0.430098
TCGA-FR-A7UA	SKCM	FALSE	FALSE	2.11	3.66	0.88	3.29	2.74	4.75	TRUE	2.11	-4.04	-0.32	-0.13	-0.17	TCGA-FR-A7UA	Immune stimulation	0.778905
TCGA-FR-A8YC	SKCM	FALSE	TRUE	-0.26	-0.4	0.77	-0.18	-0.65	0.42	FALSE	-1.02	-0.26	0.07	-0.11	0	TCGA-FR-A8YC	Immune anergy	0.13204
TCGA-FR-A8YD	SKCM	FALSE	TRUE	-0.09	-1.66	0.21	-0.98	-0.73	-1.23	FALSE	0.61	-0.09	0.02	-0.08	0.06	TCGA-FR-A8YD	Immune anergy	0.124587
TCGA-FR-A8YE	SKCM	FALSE	FALSE	1.83	0.6	0.38	0.71	0.44	0.59	TRUE	1.83	-1.61	-0.19	-0.03	-0.02	TCGA-FR-A8YE	Immune stimulation	0.683602
TCGA-FS-A1YW	SKCM	FALSE	TRUE	-0.68	-1.1	0.74	-0.92	-0.48	-1.29	FALSE	-0.95	-0.68	-0.07	-0.05	0.01	TCGA-FS-A1YW	Immune anergy	0.154225
TCGA-FS-A1YX	SKCM	FALSE	FALSE	1.06	-0.78	0.42	-0.77	-0.71	-1.16	FALSE	-0.99	1.06	0.02	0.15	0	TCGA-FS-A1YX	Immune anergy	0.245053
TCGA-FS-A1YY	SKCM	TRUE	FALSE	1.33	-2.11	0.75	-1.58	-0.93	-1.68	FALSE	-0.84	1.33	0	0.14	0.07	TCGA-FS-A1YY	Immune anergy	0.180876
TCGA-FS-A1Z0	SKCM	FALSE	TRUE	-0.9	2.12	0.4	1.15	0.54	1.38	TRUE	-0.9	-0.8	-0.01	-0.1	-0.03	TCGA-FS-A1Z0	Immune anergy	0.273104
TCGA-FS-A1Z3	SKCM	TRUE	FALSE	1.15	-1.02	0.42	-1.02	-0.73	-1.41	FALSE	-1.38	1.15	0.1	0	0.08	TCGA-FS-A1Z3	Immune anergy	0.11252
TCGA-FS-A1Z4	SKCM	FALSE	FALSE	0.52	1.43	0.6	1.04	0.41	0.48	TRUE	0.52	-1.31	-0.08	-0.1	-0.04	TCGA-FS-A1Z4	Immune stimulation	0.572571
TCGA-FS-A1Z7	SKCM	TRUE	FALSE	1.68	-1.01	0.31	-0.81	-0.82	-1.28	FALSE	-0.14	1.68	-0.06	0.3	0.03	TCGA-FS-A1Z7	Immune anergy	0.210772
TCGA-FS-A1ZA	SKCM	FALSE	FALSE	0.53	0.6	0.47	0.12	0.01	-0.22	FALSE	-0.38	0.53	0.07	0.02	-0.02	TCGA-FS-A1ZA	Immune anergy	0.22144
TCGA-FS-A1ZB	SKCM	FALSE	FALSE	0.32	-0.28	0.56	-0.34	-0.72	-1.16	FALSE	1.33	0.32	-0.09	0.13	0.01	TCGA-FS-A1ZB	Immune anergy	0.336103
TCGA-FS-A1ZC	SKCM	TRUE	FALSE	2.81	-2.27	0.4	-1.87	-1.1	-1.65	FALSE	-1.2	2.81	0.28	0.06	0.08	TCGA-FS-A1ZC	Immune exclusion	0.0641173
TCGA-FS-A1ZD	SKCM	TRUE	FALSE	2.43	-1.81	0.39	-1.11	-0.93	-0.05	FALSE	-0.45	2.43	0.11	0.18	0.09	TCGA-FS-A1ZD	Immune exclusion	0.0702032
TCGA-FS-A1ZE	SKCM	TRUE	FALSE	1.13	-1.55	0.38	-1.41	-1.12	-1.58	FALSE	-1.57	1.13	0.05	0.04	0.09	TCGA-FS-A1ZE	Immune exclusion	0.0456778
TCGA-FS-A1ZF	SKCM	TRUE	FALSE	1.74	-1.15	0.57	-0.88	-0.66	-0.86	FALSE	-1	1.74	0.12	0.06	0.09	TCGA-FS-A1ZF	Immune exclusion	0.083744
TCGA-FS-A1ZG	SKCM	FALSE	TRUE	-0.2	-1.59	0.45	-1.3	-0.95	-1.68	FALSE	-0.88	-0.2	-0.03	-0.07	0.07	TCGA-FS-A1ZG	Immune exclusion	0.0483153
TCGA-FS-A1ZH	SKCM	FALSE	FALSE	1.22	1.08	0.32	1.02	0.15	1.11	TRUE	1.22	1.36	0.05	0.18	-0.02	TCGA-FS-A1ZH	Immune anergy	0.34883
TCGA-FS-A1ZJ	SKCM	FALSE	FALSE	0.59	-0.36	0.2	-0.42	-0.72	-0.18	FALSE	-0.93	0.59	0.08	-0.07	0.08	TCGA-FS-A1ZJ	Immune anergy	0.105337
TCGA-FS-A1ZK	SKCM	TRUE	FALSE	1.12	-2.1	0.53	-1.71	-0.86	-1.85	FALSE	-1.51	1.12	0.11	-0.01	0.07	TCGA-FS-A1ZK	Immune exclusion	0.0738995
TCGA-FS-A1ZM	SKCM	FALSE	FALSE	0.59	1.21	0.37	1.02	0.15	1.49	TRUE	0.59	0.29	-0.05	0.15	-0.06	TCGA-FS-A1ZM	Immune anergy	0.269822
TCGA-FS-A1ZN	SKCM	FALSE	FALSE	0.92	-1.33	0.71	-1.09	-0.29	-1.5	FALSE	-1.34	0.92	0.06	0.04	0.03	TCGA-FS-A1ZN	Immune exclusion	0.0594949
TCGA-FS-A1ZP	SKCM	FALSE	TRUE	-0.16	-0.37	0.19	-0.43	0.28	-0.28	FALSE	-0.55	-0.16	-0.13	0.06	0.05	TCGA-FS-A1ZP	Immune anergy	0.140653
TCGA-FS-A1ZQ	SKCM	FALSE	FALSE	0.4	-1.22	0.11	-0.64	-0.62	-1.05	FALSE	0.87	0.4	0.03	0.02	0.02	TCGA-FS-A1ZQ	Immune anergy	0.279867
TCGA-FS-A1ZR	SKCM	FALSE	FALSE	0.93	0.49	0.75	-0.05	-0.01	-0.55	FALSE	-0.87	0.93	0	0.09	0.05	TCGA-FS-A1ZR	Immune anergy	0.141211
TCGA-FS-A1ZS	SKCM	TRUE	FALSE	1.96	-1.27	0.27	-1.08	-0.55	-1.51	FALSE	0.08	1.96	0.12	0.2	-0.02	TCGA-FS-A1ZS	Immune anergy	0.107601
TCGA-FS-A1ZT	SKCM	FALSE	TRUE	-0.54	1.09	0.28	0.75	1.01	1.19	TRUE	-0.54	-0.92	-0.06	-0.06	-0.02	TCGA-FS-A1ZT	Immune anergy	0.31633
TCGA-FS-A1ZU	SKCM	FALSE	FALSE	0.73	-2.05	0.36	-1.87	-1.04	-1.81	FALSE	-1.63	0.73	0.09	-0.08	0.1	TCGA-FS-A1ZU	Immune exclusion	0.0647261
TCGA-FS-A1ZW	SKCM	FALSE	TRUE	-0.94	2	0.81	1.09	1.09	1.42	TRUE	-0.94	-1.27	-0.03	-0.11	-0.05	TCGA-FS-A1ZW	Immune stimulation	0.397199
TCGA-FS-A1ZY	SKCM	FALSE	FALSE	0.67	-2.44	0.07	-1.93	-1.08	-1.76	FALSE	-0.44	0.67	0.06	-0.03	0.09	TCGA-FS-A1ZY	Immune exclusion	0.0218106
TCGA-FS-A1ZZ	SKCM	FALSE	FALSE	0.19	-0.85	0.59	-0.93	-0.51	-1.6	FALSE	-1.78	0.19	0.07	-0.06	0.01	TCGA-FS-A1ZZ	Immune exclusion	0.0495851
TCGA-FS-A4F0	SKCM	FALSE	FALSE	0.01	-1.2	0.78	-1.12	0.58	-1.77	FALSE	-1.49	0.01	0.06	-0.07	0	TCGA-FS-A4F0	Immune exclusion	0.035148
TCGA-FS-A4F2	SKCM	FALSE	FALSE	0.55	-1.76	0.81	-1.36	-0.81	-1.84	FALSE	-0.94	0.55	0.07	-0.03	0.04	TCGA-FS-A4F2	Immune anergy	0.144713
TCGA-FS-A4F4	SKCM	FALSE	FALSE	0.11	-0.72	0.3	0.08	-0.78	0.28	FALSE	1.61	0.11	-0.06	0.11	-0.01	TCGA-FS-A4F4	Immune anergy	0.215727
TCGA-FS-A4F5	SKCM	FALSE	FALSE	1.09	-0.21	0.54	-1.05	-0.58	-1.61	FALSE	-1.23	1.09	0.08	0.09	0	TCGA-FS-A4F5	Immune exclusion	0.0585561
TCGA-FS-A4F8	SKCM	FALSE	FALSE	1.87	0.95	0.29	0.95	0.08	1.58	TRUE	1.87	-1.06	-0.13	-0.02	-0.01	TCGA-FS-A4F8	Immune stimulation	0.517985
TCGA-FS-A4F9	SKCM	FALSE	TRUE	-0.12	-1.5	0.69	-1.37	-0.93	-1.5	FALSE	-1.27	-0.12	0.04	-0.11	0.06	TCGA-FS-A4F9	Immune exclusion	0.0638176
TCGA-FS-A4FB	SKCM	TRUE	FALSE	1.66	-2.08	0.77	-1.58	-1.1	-1.81	FALSE	-1.65	1.66	0.08	0.08	0.1	TCGA-FS-A4FB	Immune exclusion	0.0406737
TCGA-FS-A4FC	SKCM	FALSE	FALSE	0.98	-0.02	0.81	-0.27	-0.12	-0.65	FALSE	-0.72	0.98	0.01	0.14	0.01	TCGA-FS-A4FC	Immune anergy	0.216564
TCGA-FS-A4FD	SKCM	FALSE	FALSE	0.86	-0.27	0.17	-0.38	-0.34	-0.22	FALSE	-1.12	0.86	0.06	0	0.08	TCGA-FS-A4FD	Immune anergy	0.104606
TCGA-FW-A3I3	SKCM	FALSE	FALSE	0.65	-1.37	0.64	-1.22	-0.45	-0.84	FALSE	-1.33	0.65	0.12	-0.05	0.03	TCGA-FW-A3I3	Immune exclusion	0.0549265
TCGA-FW-A3R5	SKCM	FALSE	FALSE	0.36	0.39	0.83	-0.15	-0.39	-0.77	FALSE	-1.37	0.36	0.02	0.02	0	TCGA-FW-A3R5	Immune anergy	0.305697
TCGA-FW-A3TU	SKCM	FALSE	TRUE	-0.87	-1.53	0.22	-0.45	-0.78	-0.77	FALSE	1.3	-0.87	-0.04	-0.1	0.01	TCGA-FW-A3TU	Immune anergy	0.149642
TCGA-FW-A3TV	SKCM	FALSE	TRUE	-0.23	-0.5	0.74	-0.36	-0.44	-0.1	FALSE	-0.81	-0.23	-0.08	0.01	0.03	TCGA-FW-A3TV	Immune anergy	0.367138
TCGA-FW-A5DX	SKCM	FALSE	FALSE	0.88	-1.12	0.22	-1.33	-0.77	-1.43	FALSE	-1.65	0.88	0.1	-0.02	0.06	TCGA-FW-A5DX	Immune exclusion	0.0538376
TCGA-FW-A5DY	SKCM	FALSE	FALSE	1.33	0.54	0.64	0.81	-0.11	1.06	TRUE	1.33	-1.66	-0.13	-0.15	0.02	TCGA-FW-A5DY	Immune stimulation	0.762213
TCGA-GF-A2C7	SKCM	TRUE	FALSE	1.33	-2.12	0.42	-1.55	-0.79	-1.82	FALSE	-1.4	1.33	0.07	0.05	0.09	TCGA-GF-A2C7	Immune exclusion	0.0723698
TCGA-GF-A3OT	SKCM	FALSE	FALSE	1.71	0.71	0.46	0.62	3.27	0.06	FALSE	0.26	1.71	0.1	0.21	-0.05	TCGA-GF-A3OT	Immune anergy	0.462898
TCGA-GF-A4EO	SKCM	FALSE	FALSE	1.26	2.89	0.76	2.33	1.74	3.14	TRUE	1.26	-2.6	-0.17	-0.12	-0.12	TCGA-GF-A4EO	Immune stimulation	0.579089
TCGA-GF-A6C8	SKCM	FALSE	TRUE	-0.8	0.84	0.57	0.32	0.17	0.58	TRUE	-0.8	0.31	0.08	-0.03	-0.02	TCGA-GF-A6C8	Immune anergy	0.304616
TCGA-GF-A6C9	SKCM	FALSE	FALSE	1.74	1.73	0.58	1.63	0.02	0.58	TRUE	1.74	-1.11	-0.12	0.01	-0.06	TCGA-GF-A6C9	Immune stimulation	0.6217
TCGA-GF-A769	SKCM	TRUE	FALSE	1.77	-1.65	0.69	-1.49	-0.34	-1.64	FALSE	-1.46	1.77	0.18	0.02	0.07	TCGA-GF-A769	Immune anergy	0.116118
TCGA-GN-A262	SKCM	FALSE	FALSE	0.69	-2.02	0.66	-1.8	-1.1	-1.91	FALSE	-1.15	0.69	0.1	-0.1	0.1	TCGA-GN-A262	Immune exclusion	0.01658
TCGA-GN-A263	SKCM	FALSE	FALSE	0.01	-0.25	0.75	-0.78	0.03	-0.85	FALSE	-1.43	0.01	-0.05	0.05	0	TCGA-GN-A263	Immune anergy	0.41682
TCGA-GN-A264	SKCM	FALSE	FALSE	0.85	-1.31	0.28	-0.97	-0.84	-1.42	FALSE	-1.28	0.85	-0.04	0.13	0.05	TCGA-GN-A264	Immune anergy	0.106169
TCGA-GN-A265	SKCM	FALSE	FALSE	1.35	1.84	0.45	1.17	0.77	0.81	TRUE	1.35	0.39	-0.01	0.14	-0.08	TCGA-GN-A265	Immune stimulation	0.610354
TCGA-GN-A266	SKCM	FALSE	FALSE	0.46	2.28	0.49	1.52	1.4	0.84	FALSE	0.52	0.46	-0.05	0.19	-0.06	TCGA-GN-A266	Immune stimulation	0.356051
TCGA-GN-A267	SKCM	FALSE	TRUE	-0.43	-0.12	0.5	0.07	-0.17	1.06	FALSE	-0.94	-0.43	0	-0.09	0.02	TCGA-GN-A267	Immune anergy	0.225336
TCGA-GN-A268	SKCM	FALSE	FALSE	0.44	-1.51	0.77	-1.34	-0.78	-1.46	FALSE	-1.81	0.44	0.12	-0.12	0.06	TCGA-GN-A268	Immune exclusion	0.0461499
TCGA-GN-A26A	SKCM	FALSE	FALSE	0.94	1.07	0.44	0.73	0.14	0.15	FALSE	0.42	0.94	0.11	0.14	-0.11	TCGA-GN-A26A	Immune anergy	0.369589
TCGA-GN-A26C	SKCM	FALSE	FALSE	1.27	2.72	0.79	2.36	3.46	2.25	TRUE	1.27	-0.41	-0.06	0.09	-0.09	TCGA-GN-A26C	Immune stimulation	0.457864
TCGA-GN-A26D	SKCM	FALSE	FALSE	0.58	-1.22	0.69	-1.05	-0.92	-1.27	FALSE	-1.43	0.58	0.05	0	0.04	TCGA-GN-A26D	Immune anergy	0.125941
TCGA-GN-A4U3	SKCM	FALSE	TRUE	-0.19	-1.86	0.61	-1.42	-0.17	-1.41	FALSE	-1.08	-0.19	0.04	-0.08	0.02	TCGA-GN-A4U3	Immune anergy	0.0930038
TCGA-GN-A4U4	SKCM	FALSE	FALSE	0.14	-1.26	0.65	-1.23	-0.68	-1.04	FALSE	-1.52	0.14	0.08	-0.13	0.06	TCGA-GN-A4U4	Immune anergy	0.218073
TCGA-GN-A4U5	SKCM	FALSE	FALSE	0.98	2.4	0.77	1.76	1.68	1.85	TRUE	0.98	-0.86	-0.05	-0.02	-0.08	TCGA-GN-A4U5	Immune stimulation	0.448698
TCGA-GN-A4U7	SKCM	FALSE	FALSE	0.43	-2.61	0.57	-2.04	-0.76	-1.83	FALSE	-0.4	0.43	0.09	-0.09	0.07	TCGA-GN-A4U7	Immune anergy	0.0966247
TCGA-GN-A4U8	SKCM	FALSE	FALSE	1.37	2.76	0.78	2.18	1.26	2.86	TRUE	1.37	-2.88	-0.19	-0.2	-0.07	TCGA-GN-A4U8	Immune stimulation	0.411906
TCGA-GN-A4U9	SKCM	FALSE	FALSE	1.36	-0.34	0.07	-0.9	-0.64	-1.28	FALSE	-0.72	1.36	0.16	-0.04	0.07	TCGA-GN-A4U9	Immune anergy	0.1162
TCGA-GN-A8LK	SKCM	FALSE	FALSE	0.02	-2.61	0.57	-1.75	-0.98	-1.64	FALSE	-0.34	0.02	0.05	-0.12	0.07	TCGA-GN-A8LK	Immune exclusion	0.0475856
TCGA-GN-A8LL	SKCM	FALSE	TRUE	-0.11	-2.11	0.1	-0.97	-1.04	-1.04	FALSE	0.81	-0.11	-0.01	-0.03	0.02	TCGA-GN-A8LL	Immune exclusion	0.077719
TCGA-GN-A8LN	SKCM	FALSE	FALSE	1.45	-0.28	0.57	-0.68	-0.26	-1.29	FALSE	-1.18	1.45	0.14	0.08	0.01	TCGA-GN-A8LN	Immune anergy	0.10691
TCGA-GN-A9SD	SKCM	FALSE	FALSE	0.89	0.78	0.53	0.65	-0.37	1.48	TRUE	0.89	-0.61	-0.09	0	0	TCGA-GN-A9SD	Immune stimulation	0.552947
TCGA-HR-A2OG	SKCM	FALSE	FALSE	1.25	0.68	0.51	0.54	0.6	-0.35	FALSE	0.82	1.25	0.02	0.25	-0.07	TCGA-HR-A2OG	Immune anergy	0.355932
TCGA-HR-A2OH	SKCM	FALSE	FALSE	1.7	3.7	0.73	2.92	2.2	3.84	TRUE	1.7	-3.88	-0.26	-0.18	-0.16	TCGA-HR-A2OH	Immune stimulation	0.486811
TCGA-HR-A5NC	SKCM	FALSE	FALSE	0.88	-1.61	0.47	-1.18	-0.65	-1.76	FALSE	-0.77	0.88	-0.02	0.09	0.07	TCGA-HR-A5NC	Immune anergy	0.155092
TCGA-IH-A3EA	SKCM	FALSE	FALSE	0.12	-1.72	0.47	-0.93	-0.5	-1.43	FALSE	0.3	0.12	0.06	-0.07	0.03	TCGA-IH-A3EA	Immune anergy	0.236664
TCGA-LH-A9QB	SKCM	TRUE	FALSE	1.3	-1.51	0.44	-1.36	-0.36	-1.73	FALSE	-0.84	1.3	0.08	0.08	0.05	TCGA-LH-A9QB	Immune exclusion	0.0409519
TCGA-OD-A75X	SKCM	FALSE	FALSE	0.31	0.25	0.59	-0.56	0	-1.37	FALSE	-1.9	0.31	0.09	-0.06	0.01	TCGA-OD-A75X	Immune anergy	0.0962008
TCGA-QB-A6FS	SKCM	FALSE	FALSE	2.11	-0.05	0.13	0.87	-0.54	1.33	TRUE	2.11	-0.94	-0.06	-0.06	-0.01	TCGA-QB-A6FS	Immune anergy	0.435625
TCGA-QB-AA9O	SKCM	FALSE	FALSE	0.15	1.01	0.53	0.81	-0.01	1.37	TRUE	0.15	-0.5	0.05	-0.12	-0.02	TCGA-QB-AA9O	Immune anergy	0.267483
TCGA-RP-A690	SKCM	FALSE	TRUE	-0.83	-1.93	0.85	-1.47	-0.71	-1.49	FALSE	-0.58	-0.83	-0.08	-0.08	0.03	TCGA-RP-A690	Immune exclusion	0.0643804
TCGA-RP-A693	SKCM	FALSE	TRUE	-0.98	1.27	0.71	0.84	0.17	0.82	FALSE	0.23	-0.98	-0.1	-0.01	-0.05	TCGA-RP-A693	Immune anergy	0.423166
TCGA-RP-A694	SKCM	FALSE	TRUE	-0.39	0.23	0.73	0.11	-0.53	0.2	FALSE	-1.45	-0.39	-0.02	-0.06	0.02	TCGA-RP-A694	Immune anergy	0.319889
TCGA-W3-A824	SKCM	FALSE	TRUE	-0.27	2.07	0.93	1.57	1.49	1.7	TRUE	-0.27	-1.23	0	-0.1	-0.1	TCGA-W3-A824	Immune stimulation	0.183914
TCGA-W3-A825	SKCM	FALSE	FALSE	0.66	1	0.27	0.78	-0.35	1.44	TRUE	0.66	1.37	0.1	0.12	-0.01	TCGA-W3-A825	Immune anergy	0.22337
TCGA-W3-A828	SKCM	FALSE	FALSE	1.97	-0.82	0.31	-0.58	-0.53	-1.34	FALSE	0.63	1.97	-0.04	0.32	0.03	TCGA-W3-A828	Immune anergy	0.213148
TCGA-W3-AA1O	SKCM	FALSE	FALSE	0.9	-1.61	0.86	-1.35	-0.44	-1.58	FALSE	-1.51	0.9	0.09	-0.02	0.07	TCGA-W3-AA1O	Immune anergy	0.160253
TCGA-W3-AA1Q	SKCM	FALSE	TRUE	-0.83	0.59	0.66	0.2	0.54	0.26	FALSE	-0.92	-0.83	-0.06	-0.09	0.03	TCGA-W3-AA1Q	Immune anergy	0.271616
TCGA-W3-AA1R	SKCM	FALSE	FALSE	0.07	0.39	0.33	-0.07	-0.14	0.02	FALSE	-1.44	0.07	0.16	-0.17	0	TCGA-W3-AA1R	Immune anergy	0.179841
TCGA-W3-AA1V	SKCM	FALSE	FALSE	0.44	-0.07	0.66	0.27	2.93	-0.74	FALSE	-0.3	0.44	0.04	0.05	-0.02	TCGA-W3-AA1V	Immune anergy	0.21132
TCGA-W3-AA1W	SKCM	FALSE	FALSE	1.33	3.78	0.82	3.06	2.17	3.99	TRUE	1.33	-3.76	-0.23	-0.21	-0.15	TCGA-W3-AA1W	Immune stimulation	0.516162
TCGA-W3-AA21	SKCM	FALSE	FALSE	0.48	-1.34	0.56	-0.96	-0.93	-0.77	FALSE	-0.95	0.48	0.13	-0.08	0.02	TCGA-W3-AA21	Immune anergy	0.120421
TCGA-WE-A8JZ	SKCM	FALSE	FALSE	0.87	-0.47	0.35	-0.85	-0.53	-0.74	FALSE	-1.11	0.87	0.07	0.03	0.03	TCGA-WE-A8JZ	Immune anergy	0.105394
TCGA-WE-A8K1	SKCM	FALSE	FALSE	0.14	1.43	0.68	1.13	0.68	1.64	TRUE	0.14	-1.23	-0.02	-0.14	-0.05	TCGA-WE-A8K1	Immune stimulation	0.464748
TCGA-WE-A8K4	SKCM	FALSE	FALSE	0.37	1.98	0.91	1.49	1.14	2.74	TRUE	0.37	-1.85	-0.07	-0.13	-0.09	TCGA-WE-A8K4	Immune stimulation	0.46326
TCGA-WE-A8K5	SKCM	FALSE	FALSE	1.41	1	0.78	0.25	-0.16	0.11	FALSE	-0.99	1.41	0.09	0.09	0.04	TCGA-WE-A8K5	Immune anergy	0.161767
TCGA-WE-A8K6	SKCM	TRUE	FALSE	1.59	-1.33	0.26	-1.06	-0.9	-1.48	FALSE	-0.01	1.59	0.12	0.12	0.02	TCGA-WE-A8K6	Immune anergy	0.0871162
TCGA-WE-A8ZM	SKCM	TRUE	FALSE	1.6	-2.43	0.32	-1.56	-1	-0.77	FALSE	-0.43	1.6	0.06	0.11	0.09	TCGA-WE-A8ZM	Immune exclusion	0.0421729
TCGA-WE-A8ZN	SKCM	FALSE	FALSE	1.85	0.41	0.52	0.86	-0.03	1.28	TRUE	1.85	-0.68	-0.07	-0.01	-0.01	TCGA-WE-A8ZN	Immune anergy	0.428936
TCGA-WE-A8ZO	SKCM	FALSE	TRUE	-1.45	1.58	0.64	0.82	0.23	0.64	FALSE	-0.78	-1.45	-0.09	-0.07	-0.07	TCGA-WE-A8ZO	Immune anergy	0.203618
TCGA-WE-A8ZQ	SKCM	TRUE	FALSE	1.99	-2.09	0.29	-1.73	-0.97	-1.84	FALSE	-1.04	1.99	0.14	0.11	0.07	TCGA-WE-A8ZQ	Immune exclusion	0.0378529
TCGA-WE-A8ZR	SKCM	FALSE	TRUE	-0.2	-0.74	0.33	-0.7	-0.59	-0.77	FALSE	-1.13	-0.2	0	-0.04	0.02	TCGA-WE-A8ZR	Immune anergy	0.198265
TCGA-WE-A8ZT	SKCM	FALSE	FALSE	0.1	-1.33	0.91	-1.2	0.44	-1.25	FALSE	-1.51	0.1	0	-0.03	0.05	TCGA-WE-A8ZT	Immune anergy	0.181417
TCGA-WE-A8ZX	SKCM	FALSE	TRUE	-0.19	1.34	0.55	0.8	-0.03	1.32	TRUE	-0.19	-0.37	0.05	-0.12	0	TCGA-WE-A8ZX	Immune anergy	0.297057
TCGA-WE-A8ZY	SKCM	FALSE	FALSE	0.87	-0.71	0.46	-0.67	-0.1	-1.26	FALSE	-0.97	0.87	0.09	0.02	0.01	TCGA-WE-A8ZY	Immune anergy	0.134619
TCGA-WE-AA9Y	SKCM	TRUE	FALSE	1.54	-1.7	0.42	-0.73	-0.84	-0.79	FALSE	0.43	1.54	-0.03	0.23	0.05	TCGA-WE-AA9Y	Immune anergy	0.492672
TCGA-WE-AAA0	SKCM	FALSE	TRUE	-0.34	-0.16	0.74	-0.26	-0.44	-0.78	FALSE	-0.5	-0.34	0.04	-0.08	-0.02	TCGA-WE-AAA0	Immune anergy	0.365937
TCGA-WE-AAA3	SKCM	FALSE	FALSE	0.35	0.45	0.23	0.77	0.46	1.01	TRUE	0.35	-0.48	-0.12	0.06	0	TCGA-WE-AAA3	Immune anergy	0.292481
TCGA-WE-AAA4	SKCM	FALSE	FALSE	2.92	1.82	0.18	2.13	1.1	2.89	TRUE	2.92	-2.09	-0.19	-0.01	-0.11	TCGA-WE-AAA4	Immune stimulation	0.579939
TCGA-XV-A9VZ	SKCM	TRUE	FALSE	1.14	-1.92	0.72	-1.35	-0.96	-1.57	FALSE	0.25	1.14	0.04	0.05	0.08	TCGA-XV-A9VZ	Immune exclusion	0.0784157
TCGA-XV-A9W2	SKCM	FALSE	FALSE	0.21	-0.16	0.87	-0.96	-0.22	-1.47	FALSE	-0.54	0.21	0.07	-0.06	0.01	TCGA-XV-A9W2	Immune anergy	0.317961
TCGA-XV-A9W5	SKCM	FALSE	FALSE	1.86	-0.3	0.38	-0.21	-0.42	-0.61	FALSE	-0.05	1.86	0.16	0.11	0.01	TCGA-XV-A9W5	Immune anergy	0.273895
TCGA-XV-AAZV	SKCM	FALSE	FALSE	1.15	0.44	0.62	0.52	-0.17	0.15	TRUE	1.15	-0.3	-0.02	0	-0.03	TCGA-XV-AAZV	Immune anergy	0.477338
TCGA-XV-AAZW	SKCM	TRUE	FALSE	1.51	-1.53	0.77	-1.31	-0.78	-1.67	FALSE	-0.37	1.51	0.11	0.06	0.06	TCGA-XV-AAZW	Immune exclusion	0.0739466
TCGA-XV-AAZY	SKCM	FALSE	TRUE	-0.56	-1.17	0.22	-0.26	-0.72	-0.18	FALSE	1.82	-0.56	-0.04	-0.05	0.02	TCGA-XV-AAZY	Immune anergy	0.467324
TCGA-XV-AB01	SKCM	FALSE	TRUE	-0.28	-1.37	0.05	-0.22	-1.01	-0.45	FALSE	1.89	-0.28	-0.06	0.02	0.02	TCGA-XV-AB01	Immune exclusion	0.0853229
TCGA-YD-A89C	SKCM	TRUE	FALSE	1.83	-2.14	0.31	-1.71	-1.15	-1.69	FALSE	-1.28	1.83	0.18	-0.01	0.1	TCGA-YD-A89C	Immune anergy	0.26778
TCGA-YD-A9TA	SKCM	FALSE	FALSE	0.69	1.03	0.23	0.5	0.34	-0.05	FALSE	-0.16	0.69	0.04	0.08	-0.01	TCGA-YD-A9TA	Immune anergy	0.204822
TCGA-YG-AA3N	SKCM	FALSE	TRUE	-1.67	0.42	0.38	1.21	-0.04	2.54	FALSE	1.88	-1.67	-0.13	-0.11	-0.02	TCGA-YG-AA3N	Immune stimulation	0.335416
TCGA-YG-AA3O	SKCM	FALSE	FALSE	0.26	-0.62	0.51	-0.46	-0.6	-0.17	FALSE	-1.38	0.26	0.01	-0.02	0.06	TCGA-YG-AA3O	Immune anergy	0.205438
TCGA-YG-AA3P	SKCM	FALSE	TRUE	-0.02	-0.86	0.77	-1.29	-0.95	-1.39	FALSE	-1.8	-0.02	0.05	-0.15	0.09	TCGA-YG-AA3P	Immune exclusion	0.0376136
TCGA-Z2-A8RT	SKCM	FALSE	TRUE	-0.8	0.94	0.63	0.64	0.54	0.18	FALSE	0.2	-0.8	-0.02	-0.07	-0.03	TCGA-Z2-A8RT	Immune anergy	0.221996
TCGA-Z2-AA3S	SKCM	FALSE	TRUE	-0.65	-0.62	0.65	-0.41	-0.73	0.14	FALSE	-1.43	-0.65	-0.01	-0.16	0.07	TCGA-Z2-AA3S	Immune anergy	0.0975817
TCGA-Z2-AA3V	SKCM	FALSE	FALSE	2.72	0.08	0.08	1.27	-0.12	0.99	TRUE	2.72	-1.68	-0.15	-0.07	-0.02	TCGA-Z2-AA3V	Immune stimulation	0.502289
